1  
2  
3 **A genetically adaptable strategy for ribose scavenging in a human gut symbiont plays a**  
4 **diet-dependent role in colon colonization**  
5

6  
7  
8 Robert W. P. Glowacki<sup>1</sup>, Nicholas A. Pudlo<sup>1</sup>, Yunus Tuncil<sup>2,3</sup>, Ana S. Luis<sup>1</sup>, Anton I. Terekhov<sup>2</sup>,  
9 Bruce R. Hamaker<sup>2</sup> and Eric C. Martens<sup>1,#</sup>

10  
11  
12  
13 <sup>1</sup>Department of Microbiology and Immunology, University of Michigan Medical School, Ann  
14 Arbor, MI 48109

15  
16 <sup>2</sup>Department of Food Science and Whistler Center for Carbohydrate Research, Purdue  
17 University, West Lafayette, IN 47907

18  
19 <sup>3</sup>Current location: Department of Food Engineering, Ordu University, Ordu, Turkey  
20

21  
22  
23 Correspondence to: emartens@umich.edu

24 <sup>#</sup>Lead contact  
25

26 **Running Title:** *Bacteroides* ribose utilization  
27  
28  
29  
30  
31  
32  
33  
34  
35  
36

37  
38  
39  
40  
41  
42  
43  
44  
45  
46  
47  
48  
49  
50  
51  
52  
53  
54

## Summary

Efficient nutrient acquisition in the competitive human gut is essential for microbial persistence. While polysaccharides have been well-studied nutrients for the gut microbiome, other resources such as co-factors and nucleic acids have been less examined. We describe a series of ribose utilization systems (RUSs) that are broadly represented in Bacteroidetes and appear to have diversified to allow access to ribose from a variety of substrates. One *Bacteroides thetaiotaomicron* RUS variant is critical for competitive gut colonization in a diet-specific fashion. Using molecular genetics, we probed the nature of the ribose source underlying this diet-specific phenotype, revealing that hydrolytic functions in RUS (*e.g.*, to cleave ribonucleosides) are present but dispensable. Instead, ribokinases that are activated *in vivo* and participate in cellular ribose-phosphate metabolism are essential. Our results underscore the extensive mechanisms that gut symbionts have evolved to access nutrients and how metabolic context determines the impact of these functions *in vivo*.

## 55 **Introduction**

56 Symbiotic microorganisms that inhabit the human intestine complement digestive  
57 capacity in numerous ways, with the most mechanistically understood examples involving  
58 degradation and fermentation of chemically diverse fiber polysaccharides (Flint et al., 2012;  
59 Porter and Martens, 2017). Host digestive enzymes of salivary, gastric, and pancreatic origin  
60 target the major classes of dietary nutrients, notably fat, protein, and cooked or non-resistant  
61 starches (Goodman, 2010; Iqbal and Hussain, 2009). In contrast, dietary fibers are degraded far  
62 less, if at all, by host enzymes and instead require members of the gut microbiota for  
63 transformation into host-absorbable short chain fatty acids (Macfarlane and Macfarlane, 2003).  
64 As a consequence, dietary carbohydrates play an important role in shaping the composition and  
65 physiology of the gut microbiota (David et al., 2014; Sonnenburg et al., 2016; Sonnenburg et al.,  
66 2010). Unlike the aforementioned nutrients, the digestive fates of nucleic acids (from diet, host  
67 or microbial origin), their component covalently linked ribo- and deoxyribonucleosides and  
68 cofactors or modifications built from similar molecules are less understood. In particular, the  
69 identities of common symbiotic human gut bacteria that are capable of utilizing these molecules  
70 and the most relevant source(s) and forms of these substrates remain obscure. Since  
71 enterohemorrhagic *E. coli* (EHEC) and other pathogenic *E. coli* have been shown to utilize  
72 nutrients like ribose or deoxyribose or associated nucleic acids/nucleosides (Fabich et al., 2008;  
73 Martinez-Jehanne et al., 2009), these substrates may represent unexplored nutrient niches that are  
74 competed for by commensal and pathogenic microorganisms and therefore help mediate  
75 colonization resistance against pathogens.

76 Some commensal and pathogenic human gut bacteria have known abilities to utilize free  
77 ribose or deoxyribose, as well as (deoxy)ribonucleosides and nucleic acids. Specifically, strains  
78 of mutualistic *Lactobacillus* (McLeod et al., 2011) and *Bifidobacterium* (Pokusaeva et al., 2010),  
79 as well as pathogenic and non-pathogenic *Escherichia coli* (Fabich et al., 2008) and *Salmonella*  
80 *enterica* (Harvey et al., 2011) have characterized mechanisms for ribose catabolism. Further, the  
81 ability of EHEC to prioritize ribose as a nutrient *in vivo* is thought to provide an advantage over  
82 commensal *E. coli* HS and may delineate different niches occupied by these strains (Maltby et  
83 al., 2013). Additional systems containing nucleoside-cleaving enzymes have been defined in *E.*  
84 *coli* and certain species of *Corynebacterium* isolated from feces (Hammer-Jespersen et al., 1971;  
85 Kim et al., 2006). One of the more interesting groups of nutrients in this category that can be

86 used by some gut bacteria is DNA. As demonstrated in *E. coli*, DNA serves as a sole-carbon  
87 source through the action of competence genes and exonucleases (Finkel and Kolter, 2001;  
88 Palchevskiy and Finkel, 2009). However, mechanisms for assimilating exogenous RNA have not  
89 been explored.

90 Members of the phylum *Bacteroidetes* constitute a major portion of all bacteria found in  
91 the human gut, and species within this phylum devote large proportions of their genomes  
92 towards carbohydrate utilization via coordinately regulated polysaccharide utilization loci  
93 (PULs). A number of PULs have been investigated in great depth in model species like  
94 *Bacteroides thetaiotaomicron* and *Bacteroides ovatus* (Cuskin et al., 2015; Larsbrink et al., 2014;  
95 Luis et al., 2018; Ndeh et al., 2017). Most of the characterized systems target dietary or host  
96 polysaccharides, such as those found in plant cells, fermented foods or host mucosal  
97 polysaccharides, while others have been definitively linked to degradation of less common  
98 dietary substrates such as agarose and porphyran from edible seaweed (Hehemann, 2012;  
99 Pluvinage et al., 2018). Despite variations in the substrates they target, the cellular “Sus-like  
100 systems” encoded by *Bacteroidetes* PULs (Martens et al., 2009) are patterned in similar ways—  
101 each containing one or more TonB-dependent receptors (SusC homologs) and adjacently  
102 encoded substrate binding lipoproteins (SusD homologs). These two proteins form a complex  
103 with extensive protein-protein interactions (Glenwright et al., 2017) and work with a variable  
104 repertoire of cell surface and periplasmic carbohydrate-degrading enzymes, substrate binding  
105 proteins and regulators to bind, degrade and import their specific substrates. However, despite  
106 many studies examining the substrate specificity and function of Sus-like systems, many  
107 additional PULs have been identified in the genomes of gut and environmental *Bacteroidetes*  
108 without existing knowledge of their target substrates (Terrapon et al., 2018).

109 Here we describe a diverse set of gene clusters present in human gut and environmental  
110 *Bacteroidetes* that are regulated by ribose, but have likely evolved to target a variety of different  
111 ribose-containing nutrients. Using *Bacteroides thetaiotaomicron* (*Bt*) as a model, we investigated  
112 a PUL of unknown function that is upregulated *in vivo* in multiple dietary conditions, including  
113 in the absence of dietary fiber when this bacterium is forced to forage host-derived nutrients.  
114 This gene cluster contains two predicted ribokinases and a nucleoside hydrolase (NH) among  
115 other functions. Based on these predictions, we provide support for the hypothesis that this PUL  
116 targets ribose as a nutrient, which may in many cases need to be cleaved from covalently linked

117 sources, and show that it confers a diet-specific competitive advantage to *Bt* during *in vivo*  
118 colonization. Surprisingly, the dietary condition during which this ribose utilization system (*rus*)  
119 is required is a high-fiber diet that supplies a variety of other carbohydrate nutrients. *Bt* does not  
120 require its two *rus*-encoded hydrolytic enzymes, or SusC/D-based transport for this diet-specific  
121 competition. Instead, ribokinase function is essential, suggesting that sensing and metabolism of  
122 simpler ribose and ribose-phosphate derivatives provides the key metabolic advantage in this  
123 particular dietary condition. Taken together, our results reveal that a variety of host-associated  
124 and terrestrial bacteria, including numerous human gut symbionts have evolved mechanisms to  
125 scavenge ribose from various sources. The common regulation of a family of highly diversified  
126 PULs by a ubiquitous simple sugar that occurs in a variety of molecular contexts, such as nucleic  
127 acids, co-factors, modifications (ADP- and poly-ADP-ribose) and bacterial capsules, suggests  
128 that these systems have been adapted at the enzymatic level to release ribose from these varied  
129 sources, allowing Bacteroidetes to expand their colonization of diverse nutrient niches.

130

## 131 **Results**

### 132 **A ribose-inducible gene cluster is highly active *in vivo* and required for fitness in a diet-** 133 **dependent fashion**

134 Members of the prominent human gut bacterial phylum *Bacteroidetes* typically encode  
135 coordinated degradative functions within discrete gene clusters called polysaccharide utilization  
136 loci (PULs), facilitating identification of functions that work together to access a particular  
137 nutrient (Martens et al., 2009). Previous work using gnotobiotic mice in which *B.*  
138 *thetaiotaomicron* (*Bt*) is the only colonizing bacterium identified a locus (*BT2803-2809*) for  
139 which all individual genes are upregulated between 10- and 139-fold *in vivo*, including in mice  
140 fed diets with high and low dietary fiber (**Fig. 1A**). Under low fiber conditions, *Bt*'s physiology  
141 shifts to expression of genes involved in host glycan foraging (Bjursell et al., 2006; Martens et  
142 al., 2008; Sonnenburg et al., 2005). Thus, the corresponding expression of *BT2803-09* in the  
143 absence of dietary fiber suggests that it also targets endogenous nutrients. Interestingly, the genes  
144 in this locus were also most highly expressed in neonatal mice still consuming mothers milk,  
145 which is not only fiber-deficient but also contains milk-derived ribose and nucleosides  
146 (Schlimme et al., 2000). Typically, PULs involved in host glycan foraging encode enzymes

147 required for liberating nutrients from mucus glycoproteins: fucosidase, sulfatase,  $\beta$ -galactosidase  
148 and  $\beta$ -N-acetylhexosaminidase (Bjursell et al., 2006; Sonnenburg et al., 2005). However, some  
149 predicted enzymes encoded in the *BT2803-09* PUL (nucleoside hydrolase and ribokinases)  
150 suggest a role in harvesting ribose from substrate(s) such as nucleosides or RNA, which could be  
151 of host or gut bacterial origin. Previous studies have determined that *Bt* can grow on ribose as a  
152 sole carbon source (Martens et al., 2011). However, the genes involved, the relevant source(s) of  
153 this sugar, and whether it involves enzymatic liberation from complex sources remain unknown.

154 The architecture of the PUL spanning *BT2803-09* revealed several unique features  
155 compared to other PULs activated in low fiber diets (**Fig. 1B**). The immediate upstream gene  
156 (*BT2802*) is predicted to have DNA-binding motifs and may act as a regulator but shares no  
157 homology to regulators previously associated with PULs, the next two genes are predicted  
158 ribokinases (*BT2803* and *BT2804*), followed by genes encoding homologs of the *Bacteroides*  
159 *SusC* and *SusD* outer-membrane proteins (*BT2805*, *BT2806*), a glycoside hydrolase of  
160 unassigned family and function (*BT2807*), a predicted nucleoside hydrolase (*BT2808*), and a  
161 sugar permease (*BT2809*). The enzymes encoded in this PUL suggested the hypothesis that it is  
162 responsible for *Bt*'s ability to catabolize ribose and possibly liberate it from more complex  
163 sources, such as RNA, nucleosides, or cofactors. To test if this gene cluster is transcriptionally  
164 responsive to growth on ribose, we performed *in vitro* growth experiments in minimal-medium  
165 (MM) containing ribose as the sole carbon source and measured expression of the genes *BT2803-*  
166 *09*. All genes were activated 142-240 fold during growth on ribose compared to growth on a  
167 MM-glucose reference (**Fig. 1C**). We next examined the contribution of this PUL to ribose  
168 catabolism by deleting the entire PUL and upstream gene (*BT2802*). Consistent with an essential  
169 role in ribose catabolism, loss of the PUL eliminated the ability to grow on free ribose (**Fig. 1D**).  
170 Based on these findings, we classified this PUL as the *Bt* ribose utilization system, *rus*, with gene  
171 annotations *rusR* (putative regulator), *rusK1* and *rusK2* (ribokinases 1 and 2), *rusC* (*SusC*-like),  
172 *rusD* (*SusD*-like), *rusGH* (glycoside hydrolase), *rusNH* (nucleoside hydrolase), and *rusT*  
173 (transporter), for genes *BT2802-09* respectively. These *in vitro* results, combined with the  
174 observation that *rus* exhibits high activity in the gnotobiotic mouse gut, led us to hypothesize that  
175 the ability to utilize endogenous sources of ribose-containing nutrients is advantageous *in vivo*  
176 during fiber-deficient diets.

177 To test the above hypothesis, we inoculated 6-8 week old, germfree (GF) female Swiss-  
178 Webster mice with a mixture of wild-type and  $\Delta rus$  *Bt* strains ( $\sim 10^8$  total cfu/mouse, equal  
179 amounts of each) and maintained mice on either a fiber-rich (FR) diet containing several  
180 unprocessed plant-derived fiber polysaccharides or a fermentable fiber-free (FF) diet consisting  
181 mainly of glucose, protein, lipids, and cellulose (Desai et al., 2016). We measured the relative  
182 abundance (by qPCR) of each strain for 42 days in DNA extracted from feces. Surprisingly, and  
183 in contrast to our initial hypothesis, the  $\Delta rus$  strain was strongly outcompeted ( $\sim 100$ -fold) only in  
184 mice fed the FR diet (**Fig. 2A**). In contrast, in mice fed the FF diet,  $\Delta rus$  exhibited similar  
185 abundance to wild-type throughout the experiment (**Fig. 2B**). A similar competitive defect of the  
186  $\Delta rus$  strain in mice fed the FR diet was observed in separate experiments with 12-week-old  
187 female mice and 6-8 week old male mice (**Fig. S1A,B**), suggesting the competition is not  
188 influenced by sex or age within the range tested. The defect associated with the FR diet was not  
189 due to lack of colonization or persistence *in vivo*, as the levels of each strain were similar over  
190 time in mice colonized with either strain alone (**Fig. S1C,D**). Additionally, the defect seen in the  
191 FR diet could not be attributed to the wild-type strain exhibiting different expression of the *rus*  
192 PUL, as wild-type *Bt* exhibited similarly high levels of *rus* expression in mice fed either diet  
193 when present alone or in competition with the  $\Delta rus$  mutant (**Fig. S1E**). GC-MS analysis of the  
194 two diets revealed that ribose was present only in the FR diet, in levels similar to other common  
195 monosaccharides, and in an acid-hydrolyzable (*i.e.*, covalently linked) form, but not detectably  
196 as a free sugar. This suggested the presence of a ribose-containing molecule(s), such as RNA,  
197 nucleosides or cofactors, which may be scavenged by *Bt* in mice fed this diet (**Fig. S1F**).  
198 However, in cecal contents of mice monoassociated with wild-type or  $\Delta rus$  strains and fed the  
199 FR diet, ribose was undetectable while other sugars present in acid-hydrolyzed extracts of the  
200 uneaten FR diet—and likely deriving from fibers such as arabinan and arabinoxylan—could still  
201 be measured (**Fig. S2**, note that we determined through control experiments that the limit of  
202 detection of ribose in the complex milieu of cecal contents is near the amount observed in the FR  
203 diet, although the levels of other sugars seems to have been concentrated as much as 2-fold  
204 during digestion). This unexpected result led us to conclude that although ribose is present in the  
205 FR diet it may be depleted or absorbed during transit through the upper GI, such that it is not  
206 detectable even in the cecal contents of mice colonized by  $\Delta rus$ , which cannot use this sugar.  
207 Nevertheless, to directly test if dietary ribose from different sources can impact *Bt* in the distal

208 gut, we colonized three separate groups of GF mice with a mixture of wild-type and  $\Delta rus$  strains  
209 and maintained them on the FF diet that does not elicit a competitive defect for  $\Delta rus$ . After 14  
210 days of stable competition between strains, water was supplemented with either 1% ribose, 1%  
211 RNA, or 1% nucleosides (0.25% w/v each of uridine, thymidine, 5-methyl uridine, and cytidine).  
212 The results clearly show that free ribose present in the drinking water elicits a competitive fitness  
213 defect for the  $\Delta rus$  strain similar in magnitude and with slightly faster timing, to the defect in  
214 mice fed the FR diet (**Fig. 2C**). In contrast, little defect, if any, was observed in mice switched to  
215 water containing the nucleoside mix or RNA (**Fig. 2D,E**). Similar to mice fed just FR or FF,  
216 there was similar expression of the *rus* locus in all of the supplemented water conditions,  
217 suggesting that levels of *rus* expression did not account for the various fitness outcomes (**Fig.**  
218 **2F**). While our findings above imply that little free ribose is present in the FR diet and even the  
219 acid-hydrolyzed, covalently-linked form(s) may be removed before reaching the distal gut, our  
220 results with dietary additions of ribose-containing nutrients clearly indicate that free dietary  
221 ribose, but not RNA or nucleosides, is a form of this nutrient capable of driving abundance  
222 changes in *Bt* populations.

### 223 **A subset of ribose-utilization functions is required for competitive colonization in mice**

224 The experiments described so far utilized a mutant lacking all 8 *rus* genes, but only a  
225 subset of the functions may be important for competition with wild-type in mice fed the FR diet.  
226 Because biochemical approaches failed to reveal a clear ribose source that drives the competitive  
227 advantage associated with *rus* expression in the FR diet, we took a molecular genetic approach to  
228 probe the required enzymatic and transport functions. We constructed single and double gene  
229 deletions based on predicted functionality (**Fig. 1B**), performing additional competitive  
230 colonization experiments in FR diet-fed mice. Each individual mouse group was inoculated with  
231 wild-type *Bt* and one of the following competing strains ( $\Delta rusK1/2$ ,  $\Delta rusC/D$ ,  $\Delta rusGH/NH$ ,  
232  $\Delta rusT$ , or  $\Delta rusR$ ). Surprisingly, the only strain that exhibited a competitive fitness defect similar  
233 to the full  $\Delta rus$  mutant was  $\Delta rusK1/K2$ , which lacks both predicted ribokinases (**Fig. 3A**). In  
234 contrast, the other four deletion strains exhibited equal or better competition compared to wild-  
235 type (**Fig. 3B-E**). Notably, the  $\Delta rusGH/NH$  strain, which lacks *rus*-associated hydrolase  
236 functions, exhibited a significant competitive advantage (~100-fold better than wild-type). These  
237 results clearly suggest that the required functions underlying the competitive defect in the  $\Delta rus$



238 strain are encoded by the *rusK1* or *rusK2* genes, while expression of the other genes provide no  
239 advantage in this context, and perhaps even a fitness disadvantage in the FR diet. To further  
240 address which of the ribokinases is important *in vivo* we repeated the above competition with  
241 single  $\Delta$ *rusK1* and  $\Delta$ *rusK2* deletion strains. Each of these single kinase mutants also competed  
242 better than wild-type, suggesting that they are redundant and need to be lost together to elicit a  
243 defect (**Fig. 3F,G**). As in previous experiments, we could not attribute variations in competitive  
244 behavior to a significant difference in *rus* expression in wild-type *Bt*, which was elevated in all  
245 cases (**Fig. 3H**).

### 246 **A subset of Rus functions is required for sensing and utilization of ribose containing** 247 **nutrients *in vitro***

248 The results described above clearly indicate a diet-specific advantage for *Bt* strains that  
249 possess the *rus*-encoded ribokinases. To further define this system's function, we tested our  
250 panel of deletion mutants in a variety of growth conditions, including free ribose, nucleosides,  
251 RNA, and other sources of this sugar. Consistent with our *in vivo* data, a mutant lacking both  
252 *rusK1* and *rusK2* could not grow on free ribose (**Fig. 4A**). However, arguing against purely  
253 redundant functions as concluded above, the mutant lacking just *rusK2* displayed a complete loss  
254 of growth phenotype, while a mutant lacking only *rusK1* reproducibly displayed a substantial  
255 growth lag, but eventually grew with slightly slower rate compared than wild-type (**Fig. 4B,C**).  
256 The delayed growth phenotype of this mutant might be attributed to genetic suppressor mutations  
257 or another heritable alteration, since cells that eventually grew were able to grow quickly on  
258 ribose after being isolated and passaged in rich media (**Fig. S3A**). Deletion of the flanking gene  
259 *rusR*, a candidate transcriptional regulator, was also unable to grow on ribose, suggesting that,  
260 although it is not transcriptionally activated in response to ribose, its product plays an essential  
261 role in ribose catabolism (**Fig. 4D**). The  $\Delta$ *rusT* strain exhibited an increased lag, slower growth  
262 rate and lower overall growth level compared to wild-type (**Fig. 4E**). Unlike the  $\Delta$ *rusK1* mutant  
263 this mutant did not exhibit increased growth after passaging and re-testing, suggesting that  
264 suppressor mutations are not involved and rather another, lower-affinity pentose sugar permease  
265 is present to import ribose. Lastly, the  $\Delta$ *rusC/D* strain consistently exhibited a longer growth lag  
266 on ribose, suggesting that although ribose should freely diffuse across the outer membrane, the  
267 RusC/D complex on the cell surface might increase affinity for this sugar leading to accelerated

268 growth (**Fig. 4F**, reference growth of wild-type *Bt* on ribose is shown here). All of the other  
269 single or double deletion mutants tested ( $\Delta rusC$ ,  $\Delta rusD$ ,  $\Delta rusGH$ ,  $\Delta rusNH$ ,  $\Delta rusGH/NH$ ),  
270 exhibited no measurable difference in growth parameters compared to wild-type *Bt* when grown  
271 on ribose (**Fig. S3B-F**, **Table S1**).

272         Since they are larger and more complex, we hypothesized that utilization of molecules in  
273 which ribose is covalently linked to other ligands would require additional *rus*-encoded  
274 functions. To test this, we assayed growth of our *rus* mutants and wild-type *Bt* on nucleosides  
275 and RNA. Wild-type *Bt* displayed poor growth, when observed at all, on all nucleosides tested  
276 (uridine, cytidine, 5-methyl uridine, thymidine, inosine, xanthosine, adenosine) as well as on  
277 RNA (**Fig. S3G,H**, **Table S1**). We hypothesized that free ribose may need to be present to  
278 activate transcription of the *rus* locus, generating proteins necessary for catabolism of these  
279 substrates. To test this, we determined a concentration (0.5 mg/ml) at which ribose elicited  
280 strong *rus* expression but little if any measurable growth (**Fig. S3I,J**). We then re-evaluated the  
281 ability of wild-type *Bt* to grow on nucleosides in the presence of this low ribose concentration,  
282 observing considerably higher levels of total growth on pyrimidine nucleosides (**Fig. 4G**). While  
283 growth was still comparably poor relative to growth on pure ribose, increased growth was not  
284 observed when we doubled the nucleoside concentrations, suggesting that something else about  
285 growth on nucleosides limits growth (**Fig. S3K**). Growth on nucleosides was eliminated in  
286 mutants lacking the full locus (**Fig. 4H**), either or both ribokinases (*rusK1*, *rusK2*, and  
287 *rusK1/K2*), the candidate regulator (*rusR*) and the putative transporter (*rusT*). Each of these  
288 phenotypes was similar to those observed for growth on free ribose, except the  $\Delta rusK1$  and  
289  $\Delta rusT$  mutants, which eventually grew with reduced rate on ribose, but not on nucleosides (**Fig.**  
290 **S3L-P**). Growth on RNA alone was not observed, even after addition of ribose, suggesting that  
291 *Bt* does not produce sufficient extracellular RNase and phosphatase enzymes required to liberate  
292 nucleosides from this polymer. Therefore, we tested if exogenous RNase A and intestinal  
293 alkaline phosphatase (IAP), which are present in the gut from host pancreatic secretions (RNase)  
294 or native to the enterocyte brush boarder and secreted in luminal vesicles (IAP), could enhance  
295 growth on RNA at physiologically relevant concentrations (McConnell et al., 2009; Weickmann  
296 et al., 1984). When these host-derived enzymes were supplemented in media, growth on RNA  
297 was appreciably greater than in their absence (**Fig. 4I**), which was not attributable to *Bt* growing  
298 on the exogenous enzymes alone (**Fig. S3Q**). As with individual nucleosides, reductions or

299 eliminations in growth on enzyme-degraded RNA were observed in mutants lacking the entire  
300 *rus* locus, *rusK1*, *rusK2*, *rusK1/K2*, *rusT*, and *rusR* (**Fig. 4J**). In addition to free nucleosides and  
301 those derived from RNA, we also determined that *Bt* is able to utilize the pentoses deoxyribose  
302 and lyxose, as well as ADP-ribose and UDP-galactose: each of these required the presence of  
303 both a low amount of ribose and the *rus* locus. Sixteen additional substrates did not support *Bt*  
304 growth under any conditions (**Table S1**).

305 Inconsistent with our initial hypothesis, mutants lacking functional *rusC*, *rusD*, *rusGH*,  
306 *rusNH*, *rusC/D* or *rusGH/NH* encoded products, exhibited total growth levels comparable to  
307 wild-type on both nucleosides and degraded RNA (**Fig. 4I, S3R-W**). These results suggested that  
308 other genes in *Bt* encode functions responsible for cleavage and utilization of free nucleosides  
309 and those liberated from RNA. To identify other functions involved in utilization of nucleosides,  
310 we searched the *Bt* genome for functions from known nucleoside scavenging systems (NSSs),  
311 identifying several candidates. We made deletions of 4 genes predicted to encode nucleoside  
312 cleavage and import functions, *BT0184*, *BT1881*, *BT4330*, and *BT4554*, which are predicted to  
313 encode a uridine kinase, a purine nucleoside phosphorylase, a nucleoside permease, and a  
314 pyrimidine nucleoside phosphorylase, respectively. We tested growth of these strains on  
315 nucleosides (**Fig. 5A-D**) and only one strain ( $\Delta BT4554$ ) displayed loss of growth on all  
316 nucleosides tested, suggesting that it encodes an essential enzyme for cleaving nucleosides and  
317 works upstream of also required *rus* functions. The  $\Delta BT4330$  mutant also exhibited reductions in  
318 growth on uridine, cytidine, and 5-methyl uridine, while only slight defects were seen in  
319 thymidine (**Fig. 5A-D**). Further, the  $\Delta BT0184$  mutant displayed enhanced growth that began  
320 quicker than wild type and reached a higher total growth level on all nucleosides, except the  
321 deoxyribonucleoside thymidine. This phenotype could be due to its role in 5' phosphorylating  
322 scavenged nucleosides and shunting them towards anabolic pathways, such that when it is  
323 deleted catabolic growth is enhanced. Lastly,  $\Delta BT1881$  did not display any detectable growth  
324 defects compared to wild-type, suggesting that the product of this gene is not essential for  
325 pyrimidine nucleoside catabolism. Interestingly, although growth on nucleosides in some NSS  
326 mutants were reduced or eliminated compared to wild-type, this phenotype did not extend to  
327 growth on RNA, as the mutant strains exhibited similar levels of growth as wild-type (**Fig.**  
328 **S4A,B**). These results suggest that, while *Rus* functions are required to use RNA-derived  
329 nucleosides, the NSS functions interrogated here are not essential for catabolism of RNA-derived

330 nucleosides, which might vary in their nucleoside ratios or oligomer length and could be  
331 assimilated via additional pathways.

332

### 333 **Rus enzymes are active towards ribose-containing substrates or nucleosides**

334 The results described above suggest that the product of the *rusNH* gene, if functional, is  
335 superfluous to pyrimidine nucleoside salvage, since deletion of *BT4554* eliminated growth on  
336 these nutrients. To test if this enzyme is actually functional, we produced a recombinant *Bt*  
337 RusNH by over-expression in *E. coli* and performed substrate cleavage assays. We first used *p*-  
338 nitrophenyl- $\beta$ -D-ribofuranoside (pNP-ribose), on which this enzyme was active and determined  
339 the pH optimum to be 6.7. We next tested the cleavage specificities and affinities of ribo- and  
340 deoxyribonucleosides in a UV-based assay (Liang et al., 2008), observing that RusNH has broad,  
341 but relatively weak activity compared to other nucleoside hydrolases towards all nucleosides  
342 tested (**Table S2**). This broad range of catalytic activities suggests that this enzyme belongs to  
343 the inosine-uridine-preferring family of nucleoside hydrolases (IUNH) as predicted by  
344 annotation. However, despite containing the canonical N-terminal DXDXXXDD motif involved  
345 in binding of ribose and coordination of Ca<sup>2+</sup> ions (**Fig. S4C**), the kinetic values of RusNH are  
346 not within the range of previously characterized IUNH hydrolases from other organisms (**Table**  
347 **S2**) (Parkin et al., 1991; Shi et al., 1999; Versées and Steyaert, 2003). Although we attempted to  
348 directly measure enzyme affinities by km determination, the activity was too weak to reach  
349 Vmax at the concentrations tested, further suggesting that RusNH is not primarily responsible for  
350 nucleoside cleavage.

351 Because RusNH has relatively weak activity towards nucleosides, we hypothesized that  
352 the predicted glycoside hydrolase, RusGH, could have activity on nucleosides since it has not  
353 been assigned a previously defined glycoside hydrolase (GH) family. A potentially important  
354 role for RusGH was further suggested by its possible location on the cell surface, which was  
355 suggested by a signal peptidase II secretion-lipidation signal and confirmed by antibody staining,  
356 whereas RusNH lacks this signal and appears to be secreted into the periplasm (**Fig. S4D**, data  
357 not shown for RusNH, which was not similarly detected on the cell surface despite being  
358 detectable in whole cell lysates by western blot). We therefore produced recombinant RusGH  
359 and tested a broad-range of pNP-based substrates in several buffer conditions and found  
360 optimum conditions to be pNP-ribose at pH 9.0 (**Table S2**). Arguing against a major role in

361 cleavage of any of the substrates tested, RusGH displayed only weak activity on pNP-ribose that  
362 was too slow for accurate kinetic determinations and no detectable activity on other pNP  
363 substrates after 24 hours. Interestingly, the weak activity displayed was calcium or divalent  
364 cation dependent as addition of EDTA completely eliminated activity (**Table S2**). When RusGH  
365 was tested for the ability to cleave nucleosides for 24h, no liberation of ribose was observed.  
366 Additional testing on a panel of glycans that are capable of supporting *Bt* growth failed to reveal  
367 any additional activity. Thus, although the *Bt* Rus harbors two enzymes with demonstrable but  
368 weak activities, roles for these enzymes remains enigmatic, although it is possible that larger  
369 polymers exist that are the targets for these enzymes.

370

### 371 **Dynamics of *rus* transcript activation and global responses to ribose catabolism**

372 Our *in vivo* and *in vitro* data support an important role for some Rus functions in  
373 utilization of ribose and ribonucleosides, although a critical part of the latter pathway hinges on  
374 the function of an unlinked gene, *BT4554*. Because Rus function and a small amount of free  
375 ribose is essential for utilization of nucleosides via the *BT4554* phosphorylase, we sought to  
376 determine the requirements for activating expression of *rus* genes as well as the presence of other  
377 global responses that ribose may induce. We hypothesized that the critical Rus functions for  
378 responding to free ribose are the reaction products from one or both kinases, RusK1, RusK2, and  
379 also require the putative regulator RusR, and the permease, RusT. To test this, we examined the  
380 kinetics of *rus* transcriptional responses when *Bt* was exposed to ribose. We grew our wild-type  
381 and mutant strains in medium containing glucose as a sole carbon source, washed them in a  
382 carbohydrate-free medium, transferred the bacteria into medium containing ribose as the only  
383 carbon source and monitored *rus* transcript accumulation over time (**Fig. 5E**). Our results show  
384 that wild-type *Bt* achieves close to maximum activation between 15-30 minutes post-exposure,  
385 with continued slow increase in expression. Interestingly, the  $\Delta rusK2$  strain, which cannot grow  
386 on ribose, still generated near wild-type levels of transcript on the same time scale. In contrast,  
387 the  $\Delta rusK1$  mutant, which exhibits an extensive lag before growth on ribose, was unable to  
388 quickly generate transcript on a 2 hr time scale (**Fig. 5E**), but eventually achieves near wild-type  
389 *rus* expression once actively growing on ribose (**Fig. S4E**). This latter result is consistent with  
390 our previous observation with the *Bt* starch utilization system (Cameron et al., 2014) that growth  
391 phenotypes characterized by protracted lag periods are in some cases due to deficient ability to

392 sense an activating sugar cue. As expected based on the single kinase deletions, the  $\Delta rusK1/K2$   
393 double mutant was unable to generate transcript, while the  $\Delta rusT$  exhibited only slightly lower  
394 expression than wild-type (**Fig. 5E**). The  $\Delta rusR$  mutant only achieved partial (~10%) activation  
395 in response to ribose, which supports the idea that RusR is required for positive transcription  
396 activation and the partial expression could be due to the absence of glucose repression during  
397 ribose exposure. Finally, we measured *rus* expression dynamics in our  $\Delta rusC$  and  $\Delta rusD$  strains,  
398 with the hypothesis that these outer membrane proteins may increase the cell's affinity for ribose  
399 leading to more rapid activation, but failed to detect any differences in expression compared to  
400 wild type. (**Fig. S4F**). Further, to rule out nucleosides (processed to ribose-1-P via BT4554)  
401 serving as a possible inducing molecule we monitored *rus* transcript over time when wild type *Bt*  
402 was exposed to either uridine or inosine in the absence of ribose and did not see *rus* activation  
403 (**Fig. S4G**).

404 The two ribose-inducible kinases encoded in the *Bt rus* locus are predicted to generate  
405 products that are part of the pentose phosphate pathway (PPP), with known ribokinases adding  
406 phosphate to the 5' position, although we cannot rule out generation of (1-, 5- or 1-/5-phosphate).  
407 Thus, we hypothesized that growth on exogenous ribose may affect expression of a more global  
408 regulon that could contribute to the *in vivo* competitive defect associated with the FR diet. We  
409 initially probed expression of genes involved in metabolizing the other pentoses, xylose and  
410 arabinose, revealing that growth on ribose leads to increased expression of genes involved in  
411 arabinose utilization, but only to ~10-20% of levels when grown directly in arabinose (**Fig. 5F**),  
412 however the same effect was not seen for genes involved in xylose metabolism (**Fig. S4H**). To  
413 extend these results, we performed RNAseq-based whole-genome transcriptional profiling on  
414 wild-type *Bt* grown on ribose or glucose to address if growth on ribose elicits a broader  
415 metabolic response. The data indeed reveal a global response in which 81 genes are differentially  
416 expressed according to the parameters used. Unexpectedly, many of the genes (46%) belong to  
417 other PULs or metabolic pathways, with most of the remaining genes encoding hypothetical  
418 functions or undefined pathways. Notable changes included upregulation of a previously defined  
419 PUL for fructose and  $\beta$ 2,6-linked fructan metabolism (*BT1757-1765*; average upregulation of  
420 15-fold), which interestingly liberates fructose that initiates the PPP (Sonnenburg et al., 2010).  
421 At the same time, two other PULs of unknown specificity were repressed (*BT3024-3027*,  
422 *BT3344-3347*). Further, *Bt* has a partial TCA cycle pathway (Pan and Imlay, 2001) of which

423 several genes leading to generation of succinate and propionate were upregulated, while genes  
424 predicted to participate in sugar-phosphate isomerization and metabolism, are strongly repressed  
425 (*BT2156-2159*; average of 24-fold) (**Fig. 5G**). An experiment to test the hypothesis that cross-  
426 regulation between ribose metabolism and the fructan PUL is the cause of the FR-specific *in vivo*  
427 competition defect did not support this model since a strain lacking *rus* in the context of an  
428 inability to use fructans was still outcompeted by a strain lacking only fructan use, and this was  
429 not due to changes in *rus* activation (**Fig. S4I-J**). Thus, we conclude that the critical role of the  
430 Rus ribokinases for *Bt* fitness *in vivo* is contingent upon a more complex set of metabolic  
431 interactions that require the generation of a phosphorylated ribose signal(s) that better equips *Bt*  
432 to compete in the guts of mice fed the FR diet.

433

#### 434 **An enzyme-diversified family of Rus systems exists throughout the *Bacteroidetes***

435 While the *Bt rus* encodes two enzymes with relatively weak activity and little  
436 contribution to the *in vivo* phenotype observed on the FR diet, the architecture of this system  
437 suggests that it is equipped to liberate ribose from sources more complex than ribonucleosides.  
438 This led us to hypothesize that *rus*-like systems are found in other gut isolates and perhaps more  
439 broadly across the *Bacteroidetes* phylum. To test this, we measured the growth ability of 354  
440 different human and animal gut *Bacteroidetes* belonging to 29 species in MM-ribose, revealing  
441 that ribose utilization is widely but variably present in individual species and strains (**Fig. 6A,**  
442 **Fig. S5A**). To determine if sequenced representatives of the species/strains that grow on ribose  
443 contain a homolog of the experimentally validated *Bt rus*, we conducted a comparative genomics  
444 analysis by searching for homologs of *Bt rus* within these gut isolates. This comparison revealed  
445 that all of the sequenced strains with the ability to grow on ribose also possessed a candidate *rus*-  
446 like PUL, while none of the strains unable to grow on ribose had a homologous gene cluster.

447 Interestingly, our comparative genomics analysis revealed very similar homologs of some  
448 *rus* genes in sequenced gut isolates (*e.g.*, *Prevotella*) that were not tested in our initial survey.  
449 When we expanded the search to include these species, plus *Bacteroidetes* isolates found in other  
450 body sites and in the environment, we detected *rus*-like systems across the *Bacteroidetes*  
451 phylum, with the systems found in the genus *Bacteroides* being most similar to the prototype  
452 from *Bt*. Remarkably, we identified a total of 70 different *rus* configurations, ranging from  
453 simple two gene units (permease and kinase, which do not formally define a PUL), to *rus* PULs

454 containing as many as 36 genes (**Fig. 6B, Fig. S5B**). This analysis revealed that for almost all  
455 *rus*-like systems, the following genes are present: *rusC* and *rusD* homologs, an upstream *rusR*  
456 homolog or to a lesser extent, different regulator types (LacI is most prevalent after RusR), either  
457 one or two ribokinase genes, and a *rusT* homolog. Perhaps most intriguingly, the predicted  
458 enzymes found in different *rus*-like systems are exceptionally variable. There are at least 22  
459 different predicted glycoside hydrolase families, along with ADP-ribosylglycohydrolases (ADP-  
460 RGH), carbohydrate esterases, nucleoside hydrolases, and other predicted enzymatic activities.  
461 This plethora of enzymatic potential encoded in *rus* homologs across the *Bacteroidetes* phylum  
462 suggests individual species or strains target different ribose-containing nutrients. To further  
463 connect these predicted *rus*-like systems with ribose utilization, we probed the transcriptional  
464 response of 8 different systems during growth on MM-ribose, finding that all strains tested  
465 exhibited ~100-1000 fold upregulation relative to a MM-glucose reference (**Fig. 6C**).

## 466 **Discussion**

467 Diet impacts the human gut microbiota in many ways and members of the prominent  
468 *Bacteroidetes* phylum have developed diverse strategies to liberate sugars from often very  
469 complex dietary fiber polysaccharides (Luis et al., 2018; Ndeh et al., 2017). Such abilities equip  
470 these bacteria to compete for and utilize dietary and endogenous nutrients to sustain their  
471 populations. Diet, microbiome- and host-derived RNA, nucleosides, cofactors and other sources  
472 of ribose have been largely unexplored as potential nutrients scavenged by members of the gut  
473 microbiota. Our findings not only demonstrate that *Bt* utilizes free- and covalently-linked sources  
474 of ribose, but that this metabolic capability contributes to competitive fitness *in vivo* in a diet-  
475 dependent fashion—likely through a more complicated metabolic mechanism(s) than just  
476 acquisition of ribose. It is also clear from our comparative genomics investigation that the ability  
477 to access ribose, probably from diverse sources, extends across the *Bacteroidetes* phylum and is  
478 present in many strains from the human gut, oral cavity, and environment.

479 Based on our results we have developed a working model of ribose utilization built  
480 around findings from the *Bt rus* PUL and canonical metabolic pathways (**Fig. 7**). Components  
481 encoded directly within this PUL are required for import, recognition and phosphorylation of  
482 ribose and presumably more complicated molecules that have yet to be discovered, with RusK1  
483 being important for generating the signal for *rus* induction (**Fig. 5E**). The identity of this



484 inducing molecule is also unknown, but is unlikely to be ribose-5-P, which is presumably made  
485 during non-inducing growth on glucose via the PPP to synthesize nucleic acid components and  
486 histidine. Data also suggest it may not be ribose-1-P, which is the product of nucleoside  
487 phosphorylase and exposure to nucleosides did not activate expression (**Fig. S4G**); although, we  
488 cannot rule out that in the absence of a low amount of ribose, nucleosides are not transported to  
489 be cleaved by BT4554. This leaves ribose-1,5-diphosphate as a potentially unique candidate. Our  
490 model also postulates that the ribokinases are required for catabolism of nucleosides, which are  
491 primarily imported and cleaved by the product of the BT4554 phosphorylase. This  
492 interconnection may stem from the predicted lack of a dedicated phosphopentomutase in *Bt*,  
493 which would be required to convert ribose-1-P generated by BT4554 into ribose-5-P required for  
494 entry into the catabolic branch of the pentose phosphate pathway (PPP). As such, at least one  
495 additional kinase would be required to create ribose-1,5-PP, a precursor of PRPP that provides an  
496 alternative path back to the catabolic branch of PPP, although an orthologous enzyme that  
497 catalyzes this transition has also not been identified in *Bt*. In light of a recent study  
498 demonstrating that the *Bt* nucleoside phosphorylase (BT4554) has the ability to modify the levels  
499 of a nucleoside-containing drug (Zimmermann et al., 2019), our findings hold important  
500 implications for how native responses to this overlooked nutrient source can affect the fitness of  
501 bacteria and subsequent interactions with the metabolome around them. They also extend the  
502 range of enzymatic functions that are encoded in *Bacteroidetes* PULs beyond the known  
503 examples of carbohydrate modifying enzymes (Cuskin et al., 2015; Porter and Martens, 2017)  
504 and proteases (Nakjang et al., 2012; Renzi et al., 2015) to include those acting on nucleosides.

505         Similar to only one other PUL that was previously characterized in *Bt*, the prototypic *rus*  
506 PUL is activated in response to a monosaccharide (**Fig. 1C**), rather than the more common  
507 sensory strategies driven by oligosaccharide cues. The previously described system for fructan  
508 utilization is activated by free fructose, which occurs in two common linkages ( $\beta$ 2,1 and/or  $\beta$ 2,6)  
509 in polysaccharides for which various *Bacteroides* strains have acquired substrate-specific  
510 enzymes in their respective fructan utilization systems (Sonnenburg et al., 2010). Comparable to  
511 the ribose utilization system described here, the fructan system also contains a dedicated  
512 permease and a kinase revealing that these two systems are similarly patterned around a core  
513 monosaccharide utilization pathway. Taken together, these observations may indicate that one  
514 mechanism for PUL evolution and diversification is building enzyme systems, which liberate the

515 same sugar from multiple sources, around a central hub of sugar utilization functions such as  
516 import and phosphorylation. While covalently-linked fructose is present in only a few known  
517 forms (inulin, levan, graminins) from plant fructans and microbial capsules (van Arkel et al.,  
518 2013), ribose is much more widely present but frequently exists in a form linked to a variety of  
519 other non-sugar moieties.

520 Often, the enzymatic content of *Bacteroidetes* PULs provides a window into the fine  
521 linkage structure of the nutrient(s) that any given system has evolved to target for degradation.  
522 For example, investigation of *Bt* PULs required for degrading  $\alpha$ -mannan polysaccharides derived  
523 from fungal cell walls revealed enzymes specific for unique modifications in individual fungal  
524 species (*Saccharomyces cerevisiae*, *Schizosaccharomyces pombe* and *Candida albicans*) (Cuskin  
525 et al., 2015; Temple et al., 2017). An additional study of xyloglucan utilization PULs across  
526 multiple species revealed variants that contain  $\alpha$ -fucosidases, presumably equipping them to  
527 target fucosylated xyloglucans present in the cell walls of lettuce and other leafy greens  
528 (Larsbrink et al., 2014). Ribose is present in many diverse sources with different linkages,  
529 including RNA and nucleosides, bacterial capsules, cofactors such as NAD, cellular modification  
530 like (poly) ADP-ribose and more exotic molecules such as microcins (Duquesne et al., 2007;  
531 Knirel et al., 2002). By coupling ribose monosaccharide sensing, import, and phosphorylation to  
532 an adaptable series of enzymes encoding a large repertoire of cleavage functions, we hypothesize  
533 that the different ribose utilization systems across the *Bacteroidetes* are tuned to liberate ribose  
534 from a wide variety of sources. The breadth of this enzymatic diversity found across the phylum  
535 is emphasized by the presence of at least 22 different glycoside hydrolase families, nucleoside  
536 cleaving enzymes (nucleoside hydrolases, ADP-ribosylglycohydrolases, NAD-hydrolases),  
537 esterases, and more totaling a minimum of 70 different configurations of ribose utilization  
538 systems. Interestingly, many prominent *Bacteroides* species isolated from the human gut have  
539 ribose utilization systems with similar enzymatic content, suggesting that there may be a  
540 narrower range of common nutrient(s) targeted by these organisms in their colonic habitat.  
541 However, two of the most complex systems observed also exist in human gut *Bacteroidetes*  
542 (*Alistipes senegalensis* and *Dysgonomonas mossi*, **Fig. 6B**), suggesting that they have also  
543 adapted to more complex molecules. Finally, the large number of *rus*-encoded glycoside  
544 hydrolases suggests that a prominent target of these systems may be ribose-containing  
545 polysaccharides used to construct the capsules and exopolysaccharides of other gut bacteria, a

546 dimension of gut microbial ecology and glycobiology that has been poorly explored (Porter and  
547 Martens, 2017) despite strains of some common species like *E. coli* using ribose to construct  
548 capsules (Hackland et al., 1991).

549         Since homologs of *rus* are present in numerous members of the human gut microbiota,  
550 we hypothesized that at least one source of ribose scavenged *in vivo* would be endogenous RNA  
551 from bacteria themselves or turnover of host cells. Consistent with this idea, previous studies  
552 demonstrated that *Bt rus* is expressed to high levels *in vivo* during dietary conditions in which  
553 fiber is depleted or during *Bt* only chemostat cultures in which biofilms develop and cellular  
554 debris including RNA may accumulate (TerAvest, 2013). If an endogenous source of ribose is  
555 mostly what is scavenged *in vivo*, competition during low fiber diet feeding should have revealed  
556 a bigger defect for the  $\Delta rus$  strain compared to wild-type. However, absence of *rus* did not result  
557 in a competitive defect unless ribose was provided in the context of FF diet as a free  
558 monosaccharide. Similar supplementation with nucleosides or RNA did not reveal the same  
559 effect, suggesting that despite *Bt* being able to utilize nucleosides and enzyme-degraded RNA as  
560 carbon sources *in vitro*, dietary sources of these molecules might be absorbed before reaching the  
561 distal gut.

562         Despite lack of identification of a nutrient source(s) that drives the FR-specific diet  
563 effect, our study clearly indicates the importance of *rus in vivo*, especially in the FR diet, but also  
564 when ribose is present in addition to a low fiber diet. What is more surprising about this result is  
565 that monosaccharide analysis of the diets revealed ribose as only a minor constituent of the fiber  
566 rich diet in a covalently linked form. One possible mechanism for why the  $\Delta rus$  strain is severely  
567 outcompeted in this diet is that utilization pathways for other nutrients may be interconnected  
568 with ribose sensing in *Bt* and that small amounts of ribose below the limit of detection, but  
569 sufficient to upregulate *rus*, act to enhance utilization of other nutrients *in vivo* or optimize co-  
570 utilization of multiple nutrients. This idea is supported by our RNA-seq analysis, specifically the  
571 ribose-induced upregulation of genes involved in fructan and arabinose metabolism. Further,  
572 several genes responsible for functions encoded in the TCA cycle are upregulated in ribose,  
573 suggesting that ribose may remodel the metabolic landscape in such a way to promote faster  
574 assimilation of nutrients. Therefore, the ability to sense and respond to ribose via *rus* provides  
575 the observed competitive advantage despite only low concentrations of ribose are present from  
576 the diet. This phenomenon suggests that nutrients such as monosaccharides should not be

577 overlooked for their intrinsic simplicity and assumption that they do not affect the gut  
578 microbiota, as they may still impart changes to individual species' global metabolism.

579 A poignant example of how competitive survival in the gut requires evolution of complex  
580 nutrient acquisition strategies is exemplified by the *Bt* rhamnogalacturonan-II (RG-II) acquisition  
581 system. RG-II consists of 13 different sugars connected through 21 unique linkages and *Bt*  
582 contains three co-expressed PULs to scavenge this nutrient, using all of the individual products  
583 but one. The results described here highlight how the survival of related bacteria from the human  
584 gut and other ecosystems has driven adaptations to sense and scavenge ribose, a ubiquitous sugar  
585 that occurs in a number of different molecules, which has apparently led to enormous species and  
586 strain level variation in the enzymes present in *rus* loci. This evolution is analogous to a  
587 molecular “Swiss-army knife”, in which the core function is utilization of the simple sugar ribose  
588 but the various blades and other implements represent the enzymes that equip a given system to  
589 sense, import or harvest ribose from one or more sources. This molecular adaptability is  
590 particularly important in the context of the nutrient niche hypothesis of gut bacterial survival.  
591 While some nutrients may be scarce compared to common and abundant dietary fiber  
592 polysaccharides, competition for these lower abundance nutrients may be less intense and  
593 organisms capable of accessing them could thereby occupy a stable niche. While a number of gut  
594 bacteria, including pathogens, are capable of utilizing free ribose, the *Bacteroides* may have  
595 developed a more sophisticated ability to scavenge multiple sources of ribose from covalently  
596 linked forms. From this perspective, understanding the struggle to access this “simple” nutrient  
597 may reveal additional layers underpinning the interplay between native gut mutualists and  
598 invading pathogens.

599

## 600 **Materials and methods**

601

### 602 **Bacterial strains, culturing conditions, and molecular genetics.**

603 *B. thetaiotaomicron* ATCC 29148 (VPI-5482) and its genetic variants, as well as other  
604 *Bacteroides* strains used in this study, were routinely grown in tryptone-yeast extract-glucose  
605 (TYG) broth medium (Holdeman, 1977), in minimal medium (MM), plus a defined carbon  
606 source (Martens et al., 2008), or on brain heart infusion agar with 10% defibrinated horse blood  
607 (Colorado Serum Co.). Unless otherwise noted, carbon sources used in MM were added to a final

608 concentration of 5 mg/ml. Cultures were grown at 37°C in an anaerobic chamber (10% H<sub>2</sub>, 5%  
609 CO<sub>2</sub>, and 85% N<sub>2</sub>; Coy Manufacturing, Grass Lake, MI). Genetic deletions and mutations were  
610 performed by counter-selectable allelic exchange as previously described (Koropatkin et al.,  
611 2008). Primers used in this study are listed in **Table S6** To quantify growth on carbon sources  
612 and examine mutant phenotypes, increase in culture absorbance (600 nm) in 200µl cultures in  
613 96-well plates was measured at 10 minute intervals for at least 96 hours on an automated plate  
614 reader as previously described (Martens et al., 2011). To achieve consistent and robust growth on  
615 nucleosides and other covalently linked sources of ribose, free ribose was added at a final  
616 concentration of 0.5 mg/ml to MM containing 5 mg/ml of carbon source. Growth on 5mg/ml of  
617 MM containing Type IV Torula yeast RNA (Sigma) was obtained by adding 100 units of calf-  
618 intestinal alkaline phosphatase (CIP) (New England Biolabs) and 2mg/ml RNase A (Sigma).  
619 Growth parameters and conditions for all substrates are summarized in **Table S1**.

620

#### 621 **Genetic manipulation and recombinant protein purification in *E. coli***

622 To create a nucleoside hydrolase-free expression background, *E. coli* BL21-AI<sup>TM</sup> One  
623 Shot<sup>®</sup> cells (Invitrogen) were manipulated using lambda red recombineering to introduce genetic  
624 deletions of the ribose-inducible hydrolase genes (*rih*) to avoid contaminating activity in  
625 downstream applications of purified proteins (Petersen and Moller, 2001). The *E. coli* gene  
626 deletion procedure developed by Datsenko and Wanner (Datsenko and Wanner, 2000) was  
627 followed with few modifications. Briefly, BL21-AI cells were transformed with the pKD46  
628 plasmid. Transformed cells were grown overnight in LB + Amp<sup>100</sup> and sub-cultured, when the  
629 culture absorbance (600 nm) reached 0.1, L-arabinose was added to 10 mM final concentration  
630 to induce the P<sub>BAD</sub> promoter of pKD46, cells were allowed to grow to an OD between 0.6-0.8  
631 and made competent for electroporation by cold water washes and stored in 10% glycerol  
632 aliquots. For recombineering, 400ng of gel-purified PCR product was added to freshly made  
633 cells and incubated for 10 minutes on ice, electroporated in a 2mm gap cuvette at 2500 V,  
634 recovered in 1 ml LB at 30°C for 5 hours. All knockouts were made sequentially in this manner  
635 via introduction of the following antibiotic cassettes (spectinomycin from K11497 for  $\Delta$ *rihA*;  
636 hygromycin from K11521 for  $\Delta$ *rihB*; gentamicin from K11590 for  $\Delta$ *rihC*), and the following  
637 concentrations of antibiotic were used for selection: Spec<sup>80</sup>, Hygro<sup>200</sup>, Gent<sup>10</sup>. Following  
638 construction of the last deletion, the pKD46 plasmid was heat-cured by passaging twice at 42°C

639 in LB. To better control background expression of the T7 promoter, the T7 lysozyme containing  
640 plasmid, pLysS from BL21 (DE3) (Lucigen) was introduced into the strain via Ca<sup>2+</sup> chemical  
641 competence/heat shock. Protein purification was accomplished using the pETite N-His vector  
642 (Lucigen). PCR primers were designed to amplify products for BT2807 and BT2808 containing  
643 all amino acids downstream of the predicted signal peptide sequences, residues 22-539 for  
644 BT2807 and residues 22-338 for BT2808, amplified and transformed into Hi-Control 10G cells  
645 according to manufactures protocol (Lucigen, *Expresso*<sup>TM</sup> T7 cloning and expression system).  
646 pETite plasmids containing BT2807 or BT2808 were transformed into *E. coli* strains TUNER or  
647 BL21-AI  $\Delta$ *rihABC* + pLysS, respectively. A single colony was grown in 5 mL of LB+Kan<sup>50</sup> for  
648 16h. This pre-inoculum was added to to 1L of Terrific-Broth with 50ng/ul of Kanamycin and 10  
649 ng/ul of Chloramphenicol (BT2808) or 50ng/ul of Kanamycin (BT2807) and culture was grown  
650 with shaking at 37 °C until absorbance 0.4 at 600nm. BT2807 and BT2808 cells were induced  
651 with a final concentration of 0.2mM or 1 mM IPTG and 0.2% 20mM L-arabinose, respectively,  
652 and temperature was reduced to 16°C and outgrown overnight. The recombinant proteins were  
653 purified by immobilized metal ion affinity chromatography using cobalt (BT2807) or nickel-  
654 affinity (BT2808) columns was accomplished as described previously (Cameron et al., 2014).

655

### 656 **Measurements of transcriptional responses by qPCR**

657 *Bt* and other *Bacteroides* strains were grown to mid-exponential phase 0.6-0.8  
658 (absorbance at 600nm) in MM+ribose, MM+arabinose, MM+xylose, or MM+glucose, two  
659 volumes of RNA protect added, followed by centrifugation and storage of cell pellets at -80°C.  
660 Total RNA was extracted using the RNeasy mini kit buffers (Qiagen) and purified on RNA-  
661 binding spin columns (Epoch), treated with TURBO DNaseI (Ambion) or DNase I (NEB) after  
662 elution and purified again using a second RNeasy mini kit isolation column. Reverse  
663 transcription was performed using SuperScript III reverse transcriptase and random primers  
664 (Invitrogen). The abundance of each target transcript in the resulting cDNA was quantified using  
665 either KAPA SYBR® FAST qPCR mix (KAPA Biosystems) or a homemade qPCR mix as  
666 described here: each 20 uL reaction contained 1X Thermopol Reaction Buffer (NEB), 125uM  
667 dNTPs, 2.5mM MgSO<sub>4</sub>, 1X SYBR Green I (Lonza), 500nM gene specific or 65nM 16S rRNA  
668 primer and 0.5 units Hot Start *Taq* Polymerase (NEB), and 10ng of template cDNA. For the  
669 KAPA mix, 400 nM of primers specific for genes in the *rus* locus of *Bt* or the *rusC*-like gene of

670 other *Bacteroides* species or 62.5 nM of 16S rRNA primers and 10ng of template cDNA as  
671 described previously (Pudlo et al., 2015). Using the ddCT method, raw values were normalized  
672 to 16S rRNA values and then MM+ribose values were referenced to the values obtained in  
673 MM+glucose to obtain a fold-change. Measurements of transcriptional response over time in  
674 MM+ribose or nucleosides was performed similarly to previously described (Cameron et al.,  
675 2014). Briefly, strains were grown in TYG, subcultured 1:50 into MM+glucose, at mid-  
676 exponential phase, cells were washed twice in MM-no carbon and resuspended in MM+ribose  
677 with time points being taken every 5 min for the first 30 min and every 15 min for a total of 120  
678 min. Measurements of transcriptional responses to varying amounts of ribose were performed  
679 similarly as above, but only one time point was taken after 30 min of exposure to varying  
680 concentration of MM+ribose ranging from 0.0005 mg/ml to 5mg/ml.

681

### 682 **Gnotobiotic mouse experiments**

683 All experiments involving animals, including euthanasia via carbon dioxide asphyxiation,  
684 were approved by the University Committee on Use and Care of Animals at the University of  
685 Michigan (NIH Office of Laboratory Animal Welfare number A3114-01) and overseen by a  
686 veterinarian. Six to eight-week-old, germfree female Swiss-Webster mice were initially  
687 maintained on the standard, fiber-rich lab diet (LabDiet 5010, LabDiet, St. Louis, MO), where  
688 appropriate, mice were switched to a fiber-free diet (Envigo-Teklad TD 130343) and maintained  
689 for one week prior to colonization with *Bt* strains. After stable colonization had been observed, at  
690 day 14 some groups of mice were provided water ab libitum containing one of the following: 1%  
691 ribose, 1% Nucleoside mixture (0.25% thymidine, 0.25% uridine, 0.25% 5-methyl uridine, and  
692 0.25% cytidine) or Type VI torula yeast RNA. DNA was extracted from fecal pellets throughout  
693 the experiment and strain abundance was quantified as described previously (Desai et al., 2016).  
694 Relative abundance of each strain was normalized to the original abundance on day of gavage  
695 (day 0). Post-sacrifice, cecal contents were collected, flash frozen and stored at -80°C. RNA was  
696 extracted as described previously (Porter and Martens, 2017), briefly, RNA was phenol-  
697 chloroform treated and ethanol precipitated, DNA removed by treatment with TURBO<sup>TM</sup> DNaseI  
698 (Ambion), followed by purification using RNeasy mini kit (Qiagen) according to manufactures  
699 instructions.

700

## 701 **Antibody production, western blotting and immunofluorescent microscopy**

702 Purified recombinant BT2807 and BT2808 proteins were used as antigens to raise rabbit  
703 polyclonal antibodies (Cocalico Biologicals, Inc, Stevens PA). Antibody specificity and cellular  
704 localization for BT2807 and BT2808 were determined by western blotting of wild-type and  
705 relevant mutant strains and by immunofluorescent microscopy of *Bt* VPI-5482 grown in  
706 MM+glucose or MM+ribose. Growth conditions are described above, cells for WB were grown  
707 to mid-log optical absorbance (600 nm) 0.6-0.7 or 0.4-0.5 for IF. Western blots of *Bt* whole cell  
708 lysates were performed using the primary, polyclonal antibodies mentioned above and secondary  
709 antibody conjugated to goat anti-Rabbit IgG conjugated alkaline phosphatase (Sigma) and  
710 detected with NBT/BCIP (Roche). Surface expression of BT2807 or BT2808 was examined by  
711 staining with a BT2807- or BT2808-specific primary antibody in non-permeabilized  
712 formaldehyde-fixed *Bt* cells and detected with Alexa-Flour® 488 conjugated goat anti-Rabbit  
713 IgG secondary (Molecular Probes), as described previously (Ref). Cells were imaged on an IX-  
714 70 inverted microscope (Olympus) with images captured at 100x magnification. A minimum of  
715 five fields of view per slide was observed with n=2 biological replicates.

716

## 717 **Comparative genomics of *rus* PULs across *Bacteroidetes* genomes**

718 A total of 354 different *Bacteroidetes* strains were tested for growth on ribose as a sole  
719 carbon source as shown in **Fig. 6A** and summarized in **Table S4** The ability to use ribose is  
720 shown in the context of a previously published human gut *Bacteroidetes* phylogeny that used 14  
721 conserved genes across phylum members (Larsbrink et al., 2014). To search for *rus* locus  
722 homologs across the *Bacteroidetes* phylum, we used the amino acid sequences of the *rusK1*,  
723 *rusK2*, *rusT*, and *rusR* genes from the *Bt* type strain as deletion of these genes yielded growth  
724 defects on ribose. We searched the Integrated Microbial Genomes (IMG) database (current as of  
725 May 2018) and performed phylum-level BLAST searches with an E-value cutoff of 1e-50. We  
726 chose this stringent cutoff as initial searches using lower values obtained many non-specific hits  
727 of genes encoding other kinases and permeases that did not appear to be specific for ribose,  
728 including in the *Bt* VPI-5482 genome for which Rusk1 and RusK1 are the only kinases able to  
729 promote ribose growth. After we completed our search for *rusK*, *rusT*, and *rusR* homologs we  
730 used the Gene Neighborhood tool in IMG to determine if these hits were located directly next to  
731 other genes involved in ribose utilization. The presence of a minimum of two adjacent *rus* gene



732 homologs was required to count the presence of a candidate utilization locus. Following this first  
733 round of searching we observed that many of the *rus* loci contained one or more nucleoside  
734 cleaving enzymes such as homologs of *Bt rusNH* or ADP-ribosylglycohydrolases (RGH) and  
735 upstream putative regulatory genes. To give our search more power and potentially find  
736 additional *rus* homologs we performed additional searches with the same E-value threshold for  
737 homologs of *Bt rusNH*, or homologs of the ADP-RGH in *B. xylanisolvens XB1A*. When  
738 assembling the comparative genomics data, gene names and glycoside hydrolase family  
739 assignments are shown as predicted in IMG or by BLAST of the amino acid sequence of  
740 individual genes. Further, in refinement, a handful of genes were found below our E-value, but  
741 included in the table as it is clear from gene neighborhood views in IMG that it is likely to be  
742 part of a *rus* locus. Types of *rus* have been assigned based only on gene content and arrangement  
743 as a way to indicate differences, however subtle. In completing our table we have included the  
744 bit score as well as the amino acid % identities compared to *Bt rus* genes or *Bx XB1A* ADP-RGH  
745 genes. All of the positive gene hits with locus tag information, isolation location, and other  
746 relevant strain information is summarized in **Table S5**.

747

#### 748 **RNAseq analysis**

749 To determine the global transcriptional response to growth in ribose as the sole carbon  
750 source, *Bt* cells were grown overnight in rich TYG media then transferred to fresh MM  
751 containing either 5 mg/ml glucose or 5 mg/ml ribose. Cells were then grown until mid-log phase  
752 (absorbance between 0.6-0.8) and two volumes of RNA Protect (Qiagen) were added to cells.  
753 RNA was isolated as described above and purified whole RNA was then rRNA depleted using  
754 the Ribo-Zero Bacterial rRNA Removal Kit (Illumina Inc.) and concentrated with the RNA  
755 Clean and Concentrator-5 kit (Zymo Research Corp, Irvine, CA). Samples were multiplexed for  
756 sequencing on the Illumina HiSeq platform at the University of Michigan Sequencing Core. Data  
757 was analyzed using Arraystar software (DNASTAR, Inc.) using RPKM normalization with  
758 default parameters. Gene expression in ribose was compared to gene expression in a glucose  
759 reference. Genes with significant up- or down-regulation were determined by the following  
760 criteria: genes with and average fold-change  $\geq 5$ -fold and with at least 2/3 biological replicates  
761 with a normalized expression level  $\geq 1\%$  of the overall average RPKM expression level in either  
762 glucose or ribose, and a p-value  $< 0.05$  (t test with Benjamini-Hochberg correction) (**Table S3**).

763 **Enzyme assays**

764 Recombinant proteins purified in *E. coli*, were used to determine enzyme kinetics for  
765 RusGH and RusNH. For RusNH we used a *p*-nitrophenol-ribofuranoside substrate with  
766 absorbance readings at 405nm over a 24-hour period as described previously (Desai et al., 2016),  
767 with modifications for using purified protein instead of crude extract, using 0.5mM of enzyme in  
768 a buffer containing 20mM HEPES and 100mM NaCl, at pH 6.7 at 37°C and continuous  
769 absorbance readings. For RusGH, a panel of other 4-nitrophenol based substrates in addition to  
770 *p*-NP-ribofuranoside were tested at pH 9.0 in 100 mM Tris at 37°C for 16h with 1.5-15 µM of  
771 enzyme and using endpoint absorbance measurements. Ion requirements of the RusGH were  
772 assayed in *p*-NP-ribofuranoside by addition of divalent cations in the form of CaCl<sub>2</sub>, ZnCl<sub>2</sub>, or  
773 MgCl<sub>2</sub>, at 2, 5, or 10 mM concentrations, or in the presence of 10 mM EDTA. Specificity and  
774 kinetic parameters for RusNH on natural nucleoside substrates were determined as described  
775 previously using a UV-based assay (Parkin et al., 1991). Briefly, a 96-well, UV-compatible  
776 microplate (Santa Cruz Biotechnologies) was used with substrate concentrations ranging from  
777 0.025mM-2.5mM, and enzyme concentrations of 0.25-1µM. Assays were immediately read after  
778 addition of enzyme by continuous reading of absorbance at 262nm or 280nm with time points  
779 taken every 2.5 minutes over 12-24 hours at 37°C. Volume was 250µL in all assays and carried  
780 out in buffer containing 20mM HEPES and 100mM NaCl, at pH 6.7, adjusted with acetic acid. As  
781 a measure of catalytic efficiency, ( $K_{cat}/K_M$ ) was unable to be determined by classical Michaelis-  
782 Menton kinetics as  $V_{max}$  was never reached and therefore  $K_M$  values were not accurate, so we  
783 used a previously established method of estimating this value (Ndeh et al., 2017). Briefly, we  
784 used a single substrate concentration to calculate ( $k_{cat}/K_M$ ) and checked to be  $\ll K_M$  by halving  
785 and doubling the substrate concentration and observing a proportionate increase or decrease in  
786 rate. Therefore the equation,  $V_0 = (k_{cat}/K_M)[S][E]$  was used to calculate  $k_{cat}/K_M$  in our case. For,  
787 RusGH a panel of other 4-nitrophenol based substrates in addition to *p*-NP-ribofuranoside were  
788 tested at pH 9.0 in 100 mM Tris at 37°C for 16h with 1.5-15 µM of enzyme with endpoint  
789 absorbance measurements. Ion requirements of the RusGH were assayed in *p*-NP-ribofuranoside  
790 by addition of divalent cations in the form of CaCl<sub>2</sub>, ZnCl<sub>2</sub>, or MgCl<sub>2</sub>, at 2, 5, or 10 mM  
791 concentrations, or in the presence of 1 mM EDTA. The RusGH was tested against a panel of  
792 oligosaccharides, nucleosides and nucleotides. Briefly, the reactions were performed with 10 µM  
793 of RusGH, 8mg/ml substrate or 5mM monosaccharide in 50 mM TRIS pH 9.0 at 37 °C for 16h.

794 A control reaction was performed in the same conditions without enzyme. The activity was  
795 qualitative determined by thin layer chromatography. 6 µl of the reaction was spotted on foil  
796 backed silica plate (Silicagel 60, 20 x 20, Merck) and develop in butanol:acetic acid:water 2:1:1  
797 (mobile phase). The products of the reaction were detected by immersing the TLC plate in  
798 developer (sulphuric acid/ethanol/water 3:70:20 v/v, orcinol 1 %) for 30 seconds and heating to  
799 100 °C for 2 minutes. A standard of ribose was run in all TLC plates.

800

### 801 **Determination of free and acid hydrolysable monosaccharide content in diets and cecal** 802 **contents using GC/MS**

803 Prior to analysis, diets were ground to a fine powder using a blender followed by mortar  
804 and pestle, while cecal contents were dried by lyophilization. Samples were analyzed for free and  
805 linked monosaccharides using the following method described in (Pettolino et al., 2012). In brief,  
806 all reactions began with 1-3mg of sample and samples were hydrolyzed in 100ul of 2.5 M TFA  
807 for 90 min at 121 °C. Samples were allowed to cool to room temperature (RT) and myo-inositol  
808 was added as an internal standard (20ul of 2.5mg/ml) and dried under nitrogen. 150ul of  
809 methanol was added, dried and repeated once more. Dried samples were then reduced by  
810 dissolving in 50ul of 2M NH<sub>4</sub>OH followed by addition of 50 ul of freshly made 1M NaDB<sub>4</sub> in  
811 2M NaOH. This mixture was sonicated in a water bath for 1 min, followed by incubation at room  
812 temperature for 2.5 hours. 23ul of glacial acetic acid was added and samples dried and  
813 evaporated 2x with 250ul of 5% (v/v) acetic acid in methanol, followed by 2x evaporation with  
814 250ul of methanol, drying after each step. Acetylation was done by addition of 250ul acetic  
815 anhydride and sonicated 5 min followed by incubation at 100 °C for 2.5 hours. 2ml of ddH<sub>2</sub>O  
816 was added and sample vortexed to dissolve residue, followed by room temperature incubation for  
817 10 min. 1ml of dichloromethane (DCM) was added and vortexed followed by centrifugation at  
818 2000 rpm for 2.5 min. The aqueous phase was discarded and the DCM phase washed 2x with 2  
819 ml of ddH<sub>2</sub>O. DCM phase was dried and residue dissolved in 250 ul acetone. For free  
820 monosaccharide analysis the initial hydrolysis step with TFA was not performed. To establish a  
821 limit of detection in cecal contents, varying amounts of ribose (0.00002-0.2 mg, in 10-fold  
822 increments) were added at the same time as the myo-inositol standard to establish percent  
823 recovery throughout the methods used. Acetylated samples were analyzed on a gas  
824 chromatography (Agilent Technologies model 7890A) coupled mass spectrometer (Agilent

825 Technologies model 5975C) using a fused silica capillary column (60m x 0.25 mm x 0.2µm SP-  
826 2330, Supelco Analytical).

827

828 **Acknowledgements**

829

830 R.W.P.G. was supported by the NIH Molecular Mechanisms of Microbial Pathogenesis Training  
831 Program (T32 AI007528) as well as a University of Michigan Rackham Merit Fellowship. We  
832 thank the support of the Germ Free Mouse Facility at the University of Michigan for assistance  
833 with *in vivo* experiments. This work was supported by National Institutes of Health grants R21-  
834 AI-128120, R01-GM-099513, R01-DK-118024 (all to E.C.M).

835 **Figure Legends**

836

837 **Figure 1. *Bt* upregulates a PUL for ribose metabolism *in vivo* and *in vitro* in response to**  
838 **ribose.** (A) *In vivo* gene chip data (Bjursell et al., 2006; Sonnenburg et al., 2005) displaying fold-  
839 change relative to *in vitro* growth in minimal medium (MM), plus glucose for *BT2803-09* in  
840 mice fed high fiber (dark and light green bars) or low fiber diets, including pre-weaned, suckling  
841 mice (red and purple bars, respectively). (B) Genomic architecture of the *rus* locus spanning  
842 genes *BT2802-09* with names and predicted functions. (C) *In vitro* transcriptional response of *rus*  
843 genes in *Bt* grown on ribose as a sole carbon source, measuring fold-change relative to growth on  
844 a MM+glucose reference (n=3, error bars are SD of the mean). (D) Growth on minimal media  
845 containing ribose (5 mg/ml) as the sole carbon source in wild-type *Bt* (black) or a strain lacking  
846 *rus* (red) through 96 hours of incremental readings (minimum of n=5 separate replicates).

847

848 **Figure 2. The locus *BT2802-09* confers a competitive advantage *in vivo* in a diet-dependent**  
849 **context.** For all panels, relative abundance is shown on a log scale for wild-type (black) and  
850  $\Delta$ *rus*, *BT2802-09* (red) strains and as measured by qPCR from fecal samples of gnotobiotic mice  
851 (n=4 for each experiment) colonized with a mixture of the two strains indicated at day 0. (A)  
852 Mice continuously fed a high fiber diet (green arrow) for the entire duration. (B) Mice  
853 continuously fed a low fiber diet (pink arrow) for the entire duration. (C-E) Mice initially  
854 maintained on the FF-diet for two weeks and then at day 14 given *ad libitum* access to water  
855 containing 1% w/v ribose (C), 1% w/v of RNA from type IV *Torula* yeast RNA (D), or a 1% w/v  
856 mixture of nucleosides (0.25% each of uridine, cytidine, thymidine, and 5-methyl uridine). In  
857 each panel the duration of the water supplementation is shaded in either blue, orange, or purple,  
858 representing the different substrates. (F) *rus* transcript levels measured by qRT-PCR probing the  
859 *rusC* gene from *in vivo* cecal contents, bar colors correspond to the background shading in panels  
860 A-E. Error bars in all panels display the standard error of the mean for each time point.

861

862 **Figure 3. Ribokinases *rusK1/K2* are sufficient to confer a competitive advantage *in vivo*.**  
863 (A-G) In all experiments, 6-8 week old germfree Swiss-Webster mice were fed the fiber rich  
864 (FR) diet and gavaged with a mixture of both wild-type *Bt* (black) and the mutant strain indicated  
865 (red) in nearly equivalent levels. Relative abundance is displayed over a 42-day experiment

866 identically to Figure 2. In all panels error bars represent standard error of the mean of four  
867 biological replicates. (H) *rus* transcript levels measured by qRT-PCR probing the *rusC* gene  
868 from *in vivo* cecal contents for bacterial populations in each panel.

869

870 **Figure 4. The *Bt rus* PUL encodes functions required for growth on ribose containing**

871 **nutrients.** (A-E) Growth curves of *rus* deletion strains on ribose (red) or glucose (black) that  
872 exhibit defects for growth on ribose compared to wild-type *Bt* (see panel F. for a wild-type

873 reference curve for growth on ribose). (F) Growth of wild-type and the  $\Delta rusC/D$  strains are  
874 shown for glucose and ribose, revealing slightly weaker growth for the *rusC/D* mutant. (G-H)

875 Growth of wild-type (G) or  $\Delta rus$  (H) on different nucleosides in the presence of 0.5 mg/ml ribose

876 (yellow line is media with only 0.5 mg/ml ribose). (I-J) Growth of wild-type and *rus* deletion

877 strains on 5 mg/ml yeast RNA and media containing RNase A and IAP. Strains displaying

878 similar growth profiles as wild-type are in (I), while strains showing a reduction in growth are

879 shown in (J). Note that in panels G-H the y-axis scale is reduced. Curves shown in each panel are

880 the average of a minimum of 8 technical replicates.

881

882 **Figure 5. Requirement of some nucleoside scavenging systems, dynamics of *Bt rus***

883 **activation and global responses to ribose**

884 (A-D) Growth curves of predicted nucleoside scavenging mutants ( $\Delta BT0184$ , red;  $\Delta BT1881$ ,  
885 green;  $\Delta BT4330$ , purple; or  $\Delta BT4554$ , orange) and wild type *Bt* (black) on uridine, cytidine, 5-

886 methyl uridine or thymidine. (E) *Bt rusC* transcriptional response as measured by qRT-PCR over

887 time after mid-log phase cells actively growing in MM-glucose (5 mg/ml) were transferred to

888 MM-ribose (5 mg/ml). Samples were taken every 5 minutes for the first 30 minutes and then

889 every 15 minutes after until 120 minutes. Strains are color coded according to the legend: wild

890 type (black),  $\Delta rusK1$  (green),  $\Delta rusK1/K2$  (orange),  $\Delta rusR$  (red),  $\Delta rusK2$  (purple), and  $\Delta rusT$

891 (blue). Shown are the averages of n=3 separate experiments (different days), error bars indicate

892 the standard error of the mean. (F) Transcriptional responses of genes in the arabinose gene

893 cluster *BT0348-0355* during growth on 5 mg/ml ribose (orange) or 5 mg/ml arabinose (purple),

894 compared to *Bt* grown in MM-glucose (n=3 bars and error bars represent mean plus standard

895 error). (G) Select RNAseq results indicating a global transcriptional response during growth on

896 MM-ribose compared to a MM-glucose reference by fold-change in gene expression in each

897 condition. Matching bar colors indicate genes are in the same locus or PUL. Additional genes  
898 listed in gray bars are not genomically linked to adjacent-coordinately regulated genes. Bars  
899 represent the mean plus standard deviation of 3 replicate experiments.

900

901 **Figure 6. Ribose utilization is present throughout the Bacteroidetes phylum and *rus***  
902 **homologs appear in many configurations with highly variable enzyme content.**

903 (A) Phylogeny of 29 human gut Bacteroidetes species (plus a *P. copri* root) showing the  
904 sampling depth of the 354 strains surveyed for growth on ribose and the penetrance of ribose  
905 utilization within each species. Outer black circles at tree tips are sized to represent the number  
906 of strains sampled within each species, the inner red circles are sized to indicate the number of  
907 strains for which ribose (5 mg/ml) supports growth (each strain was tested at least 2 times for  
908 growth). (B) Comparative genomics of several variants of homologs of the *rus* locus discovered  
909 throughout the Bacteroidetes phylum as described in Methods. The schematic of gene  
910 annotations shows the vast enzymatic potential contained in different *rus* loci from the species  
911 and strains indicated. Same background fill color indicates the same predicted function(s), no-  
912 fill, white backgrounds indicate hypothetical/unknown functions. Adjacent to each locus  
913 schematic is the species in which each *rus* homolog is present followed by a parenthetical  
914 number denoting the number of sequenced isolates containing the indicated type of *rus*  
915 architecture. Each architecture is assigned an arbitrary type number denoting the different gene  
916 content and/or organization. All genes are sized relative to actual length within and between  
917 genomes. All of the species shown here are human or mammalian gut isolates, a broader  
918 representation of *rus* diversity is shown in **Fig. S6** and includes *rus* homologs from  
919 environmental and oral Bacteroidetes. Abbreviations: (GH\*, Glycoside hydrolase of unknown  
920 family/function; BACON, Bacteroidetes-Associated Carbohydrate-binding Often N-terminal  
921 domain; DHDPS, dihydrodipicolinate synthase; LacI, predicted lacI-type transcriptional  
922 regulator; MFS, Major-facilitator superfamily of transporters; ADP-RGH, ADP-ribosyl  
923 glycoside hydrolase; DNAH, DNA helicase; PBS, Polysaccharide Biosynthesis and export of O-  
924 antigen and teichoic acids; DPP7, Dipeptidyl-Peptidase 7 (serine peptidase); GT, Glycosyl  
925 Transferase). For simplicity, gene labels are only shown once with the top-most gene given a  
926 label (*i.e.*, RusNH in green). However, due to similar colors, genes annotated as BACON, LacI,  
927 MFS and aryl sulfatase are labeled throughout). Asterisks next to the organism name indicate

928 that the *rus* homolog type was shown to be upregulated during growth on ribose as the sole  
929 carbon source. (C) Fold-change of *rusC*-like transcript from the indicated species during growth  
930 on 5 mg/ml of ribose as a sole carbon source compared to growth in MM-glucose. Error bars  
931 show the SEM of n=3 biological replicates.

932

### 933 **Figure 7. Model of ribose utilization in *Bt***

934 A schematic of *Bt* metabolism of ribose and related molecules based on the data shown,  
935 predicted KEGG metabolism maps of the pentose phosphate pathway, and gene annotations.  
936 Ribose is depicted as a pink star, its official symbol nomenclature for glycans symbol, with  
937 appended phosphate or bases shown as appropriate (phosphate, yellow; uridine, blue; 5-methyl  
938 uridine, green; cytidine, dark pink; guanosine, red). Extracellular ribose should diffuse across the  
939 outer membrane and, once in the periplasm, taken up by the high-affinity ribose permease  
940 (RusT) or an alternative sugar permease. Transported ribose is then phosphorylated by RusK1  
941 and RusK2 yielding unspecified ribose-phosphates, with the product of at least RusK1 being  
942 required for *rus* transcriptional activation. Canonical pathways exist for assimilating ribose-  
943 phosphates into either catabolic pathways or synthesis of nucleic acids and histidine, although  
944 the precise entry points for RusK1/K2 derived metabolites is unknown, as are the  
945 interconversions catalyzed by steps that are not predicted to be present in *Bt* (dashed pathways  
946 with red “x” marks). Nucleosides require the additional presence of transport machinery (*e.g.*,  
947 BT4330) and nucleoside phosphorylase activity (*e.g.*, BT4554) in order to enter the cell and be  
948 catabolized in a *rus*-dependent fashion. Nucleoside transport across the outer membrane in *E.*  
949 *coli* requires a Tsx-like porin, although highly similar candidates were not found in *Bt*.

950

### 951 **Figure S1. The $\Delta$ *rus* and wild-type strain colonization, *rus* expression in all diets, and 952 dietary monosaccharide analysis of FR and FF diets.**

953 Data is related to Figure 2. Additional *in vivo* competition or monocolonization experiments  
954 performed in Swiss Webster mice fed the fiber rich (FR) diet. Relative abundance of wild type  
955 (black) vs.  $\Delta$ *rus* strain (red) were measured in (A) 12 week old female mice or (B) 6-8 week old  
956 male mice. (C) 6-8 week old female mice mono-associated with either wild-type *Bt* (pink circles)  
957 or  $\Delta$ *rus* strain (green circles) and absolute abundance was assayed by dilution plating from fresh  
958 fecal samples to obtain CFU/g feces. Data points represent mean plus SEM of n=3 mice. (D)



959 Enumerations of bacterial levels in cecal contents from the mice shown in C. (E) Expression of  
960 the *rus* locus in wild-type *Bt* in the cecal contents from experiments in Figure 2A-B (main text)  
961 and Figure S2A-B. Data points represent mean plus SEM of n=4 mice. Student's t-test was used  
962 to compare all other samples to *rus* expression in 6-8 week old females on FR diet revealing no  
963 significant (ns) differences. (F) GC/MS analysis of free and linked (acid-hydrolyzable)  
964 monosaccharides in the FR and FF diets. Data is presented as mg of sugar per gram of diet. Bars  
965 show the average plus SEM of n=3 technical replicates. Note that the FF diet contains 44% w/w  
966 glucose, which is the source of the strong free glucose signal observed with that diet.

967

968 **Figure S2. Monosaccharide content of mono-associated mice from cecal contents.**

969 Data is related to Figure 2. GC/MS analysis of free and linked (acid-hydrolyzable)  
970 monosaccharides from the cecal contents of wild type or  $\Delta rus$  mono-associated 6-8 week old,  
971 female Swiss Webster mice maintained on a fiber rich diet for 42 days. Data is presented as mg  
972 of sugar per gram of cecal contents. The pink and olive green bars represent wild type linked and  
973 free respectively, while the orange and green represent linked or free for the  $\Delta rus$  colonized  
974 mice. Bars show the average plus SEM of n=3 technical replicates. N.D. indicates that the sugar  
975 was not detectable above our limit of detection (L.O.D.) which is shown as a dotted line above  
976 the ribose bars.

977

978 **Figure S3. *Rus* deletion strains on ribose containing compounds.**

979 Data is related to Figure 4. (A) Wild-type (maize, solid line) or  $\Delta rusKI$  (blue, solid line) strains  
980 grown in MM-ribose compared to wild-type and  $\Delta rusKI$  strains that had been previously grown  
981 on MM-ribose, isolated on solid medium (BHI-blood), two separate colonies picked into rich  
982 media (TYG), and then grown in MM-ribose again shown as maize dashed lines (wild type) or  
983 blue dashed line ( $\Delta rusKI$ ) to check if the delayed growth phenotype associated with the  $\Delta rusKI$   
984 strain was the product of a genetic suppressor mutation or similar epigenetic/reprogramming. (B-  
985 F) Growth of *rus* deletion strains exhibiting similar or identical growth as wild-type on MM-  
986 ribose (red) with no obvious growth defects. Growth on MM-glucose (black) is shown for  
987 comparison. (G) Wild-type *Bt* grown in MM containing 5 mg/ml of one of the following  
988 nucleosides (uridine, blue; cytidine, pink; 5-methyl uridine, green; or thymidine, purple) without  
989 any ribose added. (H) Wild-type *Bt* grown on MM containing 5 mg/ml of yeast RNA without

990 any exogenous enzymes. (I) *rusC* transcriptional response when wild-type *Bt* was exposed to  
991 titrated amounts of ribose (mg/ml) where each data point represents a different 10-fold dilution  
992 of ribose. The red dot represents 0.5 mg/ml ribose which induces *rus* activation to comparable  
993 levels as 5 mg/ml ribose the data point directly to the left of the red point compared to growth in  
994 MM-glucose. (J) Wild-type growth on different concentrations of MM containing ribose at the  
995 following concentrations (mg/ml): 5, black; 2.5, purple; 1.25, green; 0.625, orange; 0.5, red; or  
996 0.15, blue. Growth was not detectable at levels  $\leq 0.5$  mg/ml. (K) Wild-type growth on MM  
997 containing nucleosides at concentrations of 5 mg/ml (solid lines) or 10 mg/ml (dashed lines) in  
998 the presence of 0.5 mg/ml ribose. Individual nucleoside growths are colored same as (G). (L-P)  
999 *rus* deletion strains exhibiting a complete lack of growth phenotype on all nucleosides tested are  
1000 shown as labeled. (Q) Wild-type *Bt* does not grow detectably in MM containing the enzymes  
1001 used for RNA degradation. (R-W) Individual mutants (as labeled) that do not show a growth  
1002 defect on nucleosides in the presence of 0.5mg/ml ribose.

1003

1004 **Figure S4. Further characterization of nucleoside scavenging mutants and *rus* transcript**  
1005 **activation dynamics, and relevance of global gene response to growth on ribose.**

1006 Data is related to Figure 5. (A,B) Growth of NSS mutants or wild-type *Bt* on ribose (A) or RNA  
1007 (B) (with added enzymes). Strains are color coded (wild-type, black;  $\Delta BT0184$ , red;  $\Delta BT1881$ ,  
1008 green;  $\Delta BT4330$ , purple; or  $\Delta BT4554$ , orange). (C) Multiple sequence alignment of BT2808  
1009 (RusNH) and other RusNH-like proteins from Bacteroidetes (red boxed region) compared to  
1010 previously validated nucleoside hydrolases isolated from bacteria (*E. coli*, RihA,B,C and *P.*  
1011 *fluorescens*), archaea (*S. solfataricus*), parasitic eukaryotes (*T. vivax*, *L. major*, and *C.*  
1012 *fasciculata*), moss (*P. patens*), maize (*Zea mays*), and yeast (*S. pombe*), indicating that the  
1013 predicted nucleoside hydrolase of BT2808 shares the universally conserved N-terminal  
1014 DXDXXXDD motif responsible for  $Ca^{2+}$  coordination (2<sup>nd</sup> and 4<sup>th</sup> yellow-highlighted aspartic  
1015 acid residues) and ribose binding (3<sup>rd</sup> yellow-highlighted aspartic acid), as well as the nearly  
1016 conserved canonical 1<sup>st</sup> aspartic acid residue denoting the motif (yellow or green highlighted  
1017 position). Specific to the Bacteroidetes nucleoside hydrolases, there are two additional conserved  
1018 residues, an asparagine and an additional aspartic acid within the motif (highlighted in teal) not  
1019 found IUNH family nucleoside hydrolases outside of the Bacteroidetes. (D) Immunofluorescent  
1020 microscopy of intact *Bt* whole cells grown in MM-ribose media staining with anti-BT2807

1021 (RusGH) antibody, indicating that the protein is localized to the outer surface as the secondary  
1022 antibody has clearly labeled nearly all of the cells seen in the brightfield image (left), a green  
1023 color in the fluorescent image at (right). (E) Expression of *BT2804* and *BT2805* transcript in  
1024 wild-type *Bt* (purple) or  $\Delta$ *rusKI* (red) strains after active growth had initiated in MM-ribose and  
1025 cells were sampled in mid-log phase and compared to growth in MM-glucose. Bars represent  
1026 mean, plus SD of n=3 replicates. (F) *rus* transcript during a time course experiment in which  
1027 cells were shifted from growth on MM-glucose to MM-ribose and transcript measured over time  
1028 with points every 5 minutes for the first 30 minutes and every 15 minutes after out to the  
1029 conclusion at 120 minutes post-ribose exposure. For the wild-type (black) and  $\Delta$ *rusD* (dark  
1030 yellow) strains, the *rusC* gene was probed, while for the  $\Delta$ *rusC* strain (red), the *rusD* gene was  
1031 probed (similar kinetics were seen in the wild-type strain when the *rusD* gene was used to assay  
1032 *rus* activation, data not shown). Error bars represent the SEM of n=3 replicates performed on  
1033 separate days. (G) Similar to the response experiment in Figure 5E but using nucleosides  
1034 (inosine, black line or uridine, green line) and probing *rusC* expression to address if either a  
1035 catabolized (uridine) or non-catabolized (inosine) ribose containing compound could stimulate  
1036 *rus* activation, with no response detected compared to growth in MM-glucose. (H) As in Figure  
1037 5F, we probed expression of the genes required for xylose metabolism (*BT0791-0795*) when  
1038 wild-type *Bt* was grown on MM-xylose (green bars) or MM-ribose (blue bars) and compared to  
1039 *Bt* grown in MM-glucose. (I) *in vivo* competition of a strain lacking the entire fructan PUL,  
1040 *BT1754-1765* ( $\Delta$ *fruc*, blue line) against a strain lacking both the fructan PUL and the *rus* PUL  
1041 ( $\Delta$ *fruc*/ $\Delta$ *rus*, orange line) in 6-8 week old Swiss-Webster female mice maintained on the FR diet.  
1042 The relative fecal abundance is shown on a log scale as assayed by qPCR over the course of the  
1043 experiment, error bars show the SEM of n=4 mice. (J) *in vivo* *rus* expression from cecal contents  
1044 of the mice in I. measuring expression of the *rusC* gene, error bar shows the SEM of n=4 mice.

1045

1046 **Figure S5. An expanded repertoire of *rus* architectures across the Bacteroidetes phylum.**

1047 Related to Figure 6. Comparative genomics analysis of a broader survey of members of the  
1048 Bacteroidetes phylum, revealing many different types of the *rus* locus. This figure displays  
1049 almost all of the additional locus types found in both the human gut isolates along with those  
1050 found in aquatic, soil, and human oral environments. Not shown are subtypes, where the same  
1051 genes are present, but arranged differently, as well as types 21, 30, 33, 36, 39, 44, 48, 46, and 61,

1052 for which only one example was identified and gene arrangements had less complexity than the  
1053 majority shown here (all loci are listed in **Table S5**). As in Figure 6, the gene size is scaled  
1054 within and between genomes and the background color is kept constant for genes predicted to  
1055 encode the same functions. Gene abbreviations are as follows in order of appearance: (DeoR,  
1056 DeoR-like family of transcriptional regulator; MFS, Major Facilitator Superfamily of  
1057 transporters; FADOR, Flavin (FAD) Oxidoreductase; NAD, NAD Binding Protein; CK,  
1058 Carbohydrate Kinase, unknown family; GDPDE, Glycerophosphoryl Diester Phosphodiesterase;  
1059 NH, Nucleoside Hydrolase; GH, Glycoside hydrolase; HAD, Haloacid Dehydrogenase; LacI,  
1060 LacI-type transcriptional regulator; FrcK, fructokinase; FGE, Formylglycine-Generating  
1061 Enzyme, required for sulfatase activity; NADP-DH, NADP-Dependent aldehyde  
1062 Dehydrogenase; ALT-DH, Altronate Dehydrogenase; kxD, 2-dehydro-3-deoxy-D-arabinonate  
1063 dehydratase; AraC, AraC-like transcriptional regulator; Rib Iso, Ribose-5-Phosphate Isomerase;  
1064 Tn-ase, transposase; BACON, Bacteroidetes-Associated Carbohydrate-binding Often N-terminal  
1065 domain; cpdA, 3'.5'-cyclic AMP phosphodiesterase; EEPase, Endo-Exo Nucleoside-  
1066 Phosphatase; TAT, Twin-Arginine Translocase; BNR, BNR repeat-like domain; SIAE, Sialate  
1067 O-acetylerase; DPP IV, Dipeptidyl-peptidase IV; \*\*\*, RNA polymerase sigma factor ECF  
1068 subfamily; FecR, FecR-like transcriptional regulator; SusE, Bacteroides SusE-like outer  
1069 membrane binding protein; GntR, GntR-like transcriptional regulator; FBA, Fructose  
1070 Bisphosphate Aldolase; Xyl Iso, Xylose Isomerase; ROK, Repressor/ORF/Kinase domain  
1071 containing protein; ADH, Alcohol Dehydrogenase; LmbE, N-acetylglucosaminyl deacetylase  
1072 LmbE-like family; E/L/P, Esterase/Lipase/Peptidase-like domain containing protein; RhaA,  
1073 Regulator of RNaseE activity; Acid Pase, Acid Phosphatase-like protein).

1074

## 1075 **References**

1076

1077 Bjursell, M.K., Martens, E.C., and Gordon, J.I. (2006). Functional genomic and metabolic  
1078 studies of the adaptations of a prominent adult human gut symbiont, *Bacteroides*  
1079 *thetaiotaomicron*, to the suckling period. *J. Biol. Chem.* *281*, 36269-36279.

1080 Cameron, E.A., Kwiatkowski, K.J., Lee, B.H., Hamaker, B.R., Koropatkin, N.M., and Martens,  
1081 E.C. (2014). Multifunctional nutrient-binding proteins adapt human symbiotic bacteria for  
1082 glycan competition in the gut by separately promoting enhanced sensing and catalysis. *mBio* *5*.  
1083 e01441-14

- 1084 Cuskin, F., Lowe, E.C., Temple, M.J., Zhu, Y., Cameron, E., Pudlo, N.A., Porter, N.T., Urs, K.,  
1085 Thompson, A.J., Cartmell, A., et al. (2015). Human gut Bacteroidetes can utilize yeast mannan  
1086 through a selfish mechanism. *Nature* 517, 165-169.
- 1087 Datsenko, K.A., and Wanner, B.L. (2000). One-step inactivation of chromosomal genes in  
1088 *Escherichia coli* K-12 using PCR products. *Proc. Natl. Acad. Sci. USA* 97, 6640-6645.
- 1089 David, L.A., Maurice, C.F., Carmody, R.N., Gootenberg, D.B., Button, J.E., Wolfe, B.E., Ling,  
1090 A.V., Devlin, A.S., Varma, Y., Fischbach, M.A., et al. (2014). Diet rapidly and reproducibly  
1091 alters the human gut microbiome. *Nature* 505, 559-563.
- 1092 Desai, M.S., Seekatz, A.M., Koropatkin, N.M., Kamada, N., Hickey, C.A., Wolter, M., Pudlo,  
1093 N.A., Kitamoto, S., Terrapon, N., Muller, A., et al. (2016). A Dietary Fiber-Deprived Gut  
1094 Microbiota Degrades the Colonic Mucus Barrier and Enhances Pathogen Susceptibility. *Cell*  
1095 167, 1339-1353 e1321.
- 1096 Duquesne, S., Petit, V., Peduzzi, J., and Rebuffat, S. (2007). Structural and functional diversity  
1097 of microcins, gene-encoded antibacterial peptides from enterobacteria. *J. Mol. Microb. Biotech.*  
1098 13, 200-209.
- 1099 Fabich, A.J., Jones, S.A., Chowdhury, F.Z., Cernosek, A., Anderson, A., Smalley, D.,  
1100 McHargue, J.W., Hightower, G.A., Smith, J.T., Autieri, S.M., et al. (2008). Comparison of  
1101 Carbon Nutrition for Pathogenic and Commensal *Escherichia coli* Strains in the Mouse Intestine.  
1102 *Infect. Immun.* 76, 1143-1152.
- 1103 Finkel, S.E., and Kolter, R. (2001). DNA as a nutrient: novel role for bacterial competence gene  
1104 homologs. *J. Bacteriol.* 183, 6288-6293.
- 1105 Flint, H.J., Scott, K.P., Duncan, S.H., Louis, P., and Forano, E. (2012). Microbial degradation of  
1106 complex carbohydrates in the gut. *Gut Microbes* 3, 289-306.
- 1107 Glenwright, A.J., Pothula, K.R., Bhamidimarri, S.P., Chorev, D.S., Basle, A., Firbank, S.J.,  
1108 Zheng, H., Robinson, C.V., Winterhalter, M., Kleinekathofer, U., et al. (2017). Structural basis  
1109 for nutrient acquisition by dominant members of the human gut microbiota. *Nature* 541, 407-  
1110 411.
- 1111 Goodman, B.E. (2010). Insights into digestion and absorption of major nutrients in humans. *Adv.*  
1112 *Physiol. Educ.* 34, 44-53.
- 1113 Hackland, L.P., Parolis, H., and Parolis, L.A.S. (1991). *Escherichia coli* O9:K38 capsular  
1114 antigen: another ribofuranose-containing glycan. *Carbohydr. Res.* 219, 193-201.
- 1115 Hammer-Jespersen, K., Munch-Petersen, A., Schwartz, M., and Nygaard, P. (1971). Induction of  
1116 Enzymes Involved in the Catabolism of Deoxyribonucleosides and Ribonucleosides in *E.coli*  
1117 K12, 1971. *Eur. J. Biochem.* 19, 533-538.
- 1118 Harvey, P.C., Watson, M., Hulme, S., Jones, M.A., Lovell, M., Berchieri, A., Jr., Young, J.,  
1119 Bumstead, N., and Barrow, P. (2011). *Salmonella enterica* serovar typhimurium colonizing the

1120 lumen of the chicken intestine grows slowly and upregulates a unique set of virulence and  
1121 metabolism genes. *Infect. Immun.* *79*, 4105-4121.

1122 Hehemann, J.K., A.G.; Pudlo, P.A.; Martens, E.C.; Boraston, A.B. (2012). Bacteria of the human  
1123 gut microbiome catabolize seaweed glycans with carbohydrate-active enzymes update from  
1124 extrinsic microbes. *Proc. Natl. Acad. Sci. USA* *109*, 19786-19791.

1125 Holdeman, L.V.C. (1977). *Anaerobe Laboratory Manual*, 4th edn. (Anaerobe Laboratory  
1126 Virginia Polytechnic Institute & State University).

1127 Iqbal, J., and Hussain, M.M. (2009). Intestinal lipid absorption. *Am. J. Physiol-Endoc. M.* *296*,  
1128 e1183-1194.

1129 Kim, H.S., Lee, J.H., Lee, W.S., and Bang, W.G. (2006). Genes encoding ribonucleoside  
1130 hydrolase 1 and 2 from *Corynebacterium ammoniagenes*. *Microbiology* *152*, 1169-1177.

1131 Knirel, Y.A., Kocharova, N.A., Bystrova, O.V., Katzenellenbogen, E., and Gamian, A. (2002).  
1132 Structures and serology of the O-specific polysaccharides of bacteria of the genus *Citrobacter*.  
1133 *Arch. Immunol. Ther. Exp.* *50*, 379-391.

1134 Koropatkin, N.M., Martens, E.C., Gordon, J.I., and Smith, T.J. (2008). Starch catabolism by a  
1135 prominent human gut symbiont is directed by the recognition of amylose helices. *Structure* *16*,  
1136 1105-1115.

1137 Larsbrink, J., Rogers, T.E., Hemsworth, G.R., McKee, L.S., Tauzin, A.S., Spadiut, O., Klintner,  
1138 S., Pudlo, N.A., Urs, K., Koropatkin, N.M., et al. (2014). A discrete genetic locus confers  
1139 xyloglucan metabolism in select human gut Bacteroidetes. *Nature* *506*, 498-502.

1140 Liang, L., He, X., Liu, G., and Tan, H. (2008). The role of a purine-specific nucleoside hydrolase  
1141 in spore germination of *Bacillus thuringiensis*. *Microbiology* *154*, 1333-1340.

1142 Luis, A.S., Briggs, J., Zhang, X., Farnell, B., Ndeh, D., Labourel, A., Basle, A., Cartmell, A.,  
1143 Terrapon, N., Stott, K., et al. (2018). Dietary pectic glycans are degraded by coordinated enzyme  
1144 pathways in human colonic *Bacteroides*. *Nat. Microbiol.* *3*, 210-219.

1145 Macfarlane, S., and Macfarlane, G.T. (2003). Regulation of short-chain fatty acid production.  
1146 *Proc. Nutr. Soc.* *62*, 67-72.

1147 Maltby, R., Leatham-Jensen, M.P., Gibson, T., Cohen, P.S., and Conway, T. (2013). Nutritional  
1148 basis for colonization resistance by human commensal *Escherichia coli* strains HS and Nissle  
1149 1917 against *E. coli* O157:H7 in the mouse intestine. *PLoS One* *8*, e53957.

1150 Martens, E.C., Chiang, H.C., and Gordon, J.I. (2008). Mucosal glycan foraging enhances fitness  
1151 and transmission of a saccharolytic human gut bacterial symbiont. *Cell Host Microbe* *4*, 447-457.

1152 Martens, E.C., Koropatkin, N.M., Smith, T.J., and Gordon, J.I. (2009). Complex glycan  
1153 catabolism by the human gut microbiota: the Bacteroidetes Sus-like paradigm. *J. Biol. Chem.*  
1154 *284*, 24673-24677.

1155 Martens, E.C., Lowe, E.C., Chiang, H., Pudlo, N.A., Wu, M., McNulty, N.P., Abbott, D.W.,  
1156 Henrissat, B., Gilbert, H.J., Bolam, D.N., et al. (2011). Recognition and degradation of plant cell  
1157 wall polysaccharides by two human gut symbionts. *PLoS Biol.* *9*, e1001221.

1158 Martinez-Jehanne, V., du Merle, L., Bernier-Febreau, C., Usein, C., Gassama-Sow, A., Wane,  
1159 A.A., Gouali, M., Damian, M., Aidara-Kane, A., Germani, Y., et al. (2009). Role of deoxyribose  
1160 catabolism in colonization of the murine intestine by pathogenic *Escherichia coli* strains. *Infect.*  
1161 *Immun.* *77*, 1442-1450.

1162 McConnell, R.E., Higginbotham, J.N., Shifrin, D.A., Jr., Tabb, D.L., Coffey, R.J., and Tyska,  
1163 M.J. (2009). The enterocyte microvillus is a vesicle-generating organelle. *J. Cell. Biol.* *185*,  
1164 1285-1298.

1165 McLeod, A., Snipen, L., Naterstad, K., and Axelsson, L. (2011). Global transcriptome response  
1166 in *Lactobacillus sakei* during growth on ribose. *BMC Microbiol.* *11*, 145.

1167 Nakjang, S., Ndeh, D.A., Wipat, A., Bolam, D.N., and Hirt, R.P. (2012). A novel extracellular  
1168 metallopeptidase domain shared by animal host-associated mutualistic and pathogenic microbes.  
1169 *PloS One* *7*, e30287.

1170 Ndeh, D., Rogowski, A., Cartmell, A., Luis, A.S., Basle, A., Gray, J., Venditto, I., Briggs, J.,  
1171 Zhang, X., Labourel, A., et al. (2017). Complex pectin metabolism by gut bacteria reveals novel  
1172 catalytic functions. *Nature* *544*, 65-70.

1173 Palchevskiy, V., and Finkel, S.E. (2009). A role for single-stranded exonucleases in the use of  
1174 DNA as a nutrient. *J. Bacteriol.* *191*, 3712-3716.

1175 Pan, N., and Imlay, J.A. (2001). How does oxygen inhibit central metabolism in the obligate  
1176 anaerobe *Bacteroides thetaiotaomicron*. *Mol. Microbiol.* *39*, 1562-1571.

1177 Parkin, D.W., Horenstein, B.A., Abdulah, D.R., Estupinan, B., and Schramm, V.L. (1991).  
1178 Nucleoside Hydrolase from *Crithidia fasciculata*. Metabolic role, purification, specificity, and  
1179 kinetic mechanism. *J. Biol. Chem.* *266*, 20658-20665.

1180 Petersen, C., and Moller, L.B. (2001). The RihA, RihB, and RihC ribonucleoside hydrolases of  
1181 *Escherichia coli*. Substrate specificity, gene expression, and regulation. *J. Biol. Chem.* *276*, 884-  
1182 894.

1183 Pettolino, F.A., Walsh, C., Fincher, G.B., and Bacic, A. (2012). Determining the polysaccharide  
1184 composition of plant cell walls. *Nat. Protoc.* *7*, 1590-1607.

1185 Pluvinaige, B., Grondin, J.M., Amundsen, C., Klassen, L., Moote, P.E., Xiao, Y., Thomas, D.,  
1186 Pudlo, N.A., Anele, A., Martens, E.C., et al. (2018). Molecular basis of an agarose metabolic  
1187 pathway acquired by a human intestinal symbiont. *Nat. Commun.* *9*, 1043.

1188 Pokusaeva, K., Neves, A.R., Zomer, A., O'Connell-Motherway, M., MacSharry, J., Curley, P.,  
1189 Fitzgerald, G.F., and van Sinderen, D. (2010). Ribose utilization by the human commensal  
1190 *Bifidobacterium breve* UCC2003. *Microb. Biotechnol.* *3*, 311-323.

- 1191 Porter, N.T., and Martens, E.C. (2017). The Critical Roles of Polysaccharides in Gut Microbial  
1192 Ecology and Physiology. *Annu. Rev. Microbiol.* *71*, 349-369.
- 1193 Pudlo, N.A., Urs, K., Kumar, S.S., German, J.B., Mills, D.A., and Martens, E.C. (2015).  
1194 Symbiotic Human Gut Bacteria with Variable Metabolic Priorities for Host Mucosal Glycans.  
1195 *mBio* *6*, e01282-01215.
- 1196 Renzi, F., Manfredi, P., Dol, M., Fu, J., Vincent, S., and Cornelis, G.R. (2015). Glycan-foraging  
1197 systems reveal the adaptation of *Campylobacter jejuni* to the dog mouth. *mBio* *6*, e02507.
- 1198 Schlimme, E., Martin, D., and Meisel, H. (2000). Nucleosides and Nucleotides; Natural  
1199 Bioactive Substances in Milk and Colostrum. *Br. J. Nutr.* *84*, S59-68.
- 1200 Shi, W., Schramm, V.L., and Almo, S.C. (1999). Nucleoside Hydrolase from *Leishmania major*:  
1201 Cloning, Expression, Catalytic Properties, Transition State Inhibitors, And The 2.5-Å Crystal  
1202 Structure. *J. Biol. Chem.* *274*, 21114-21120.
- 1203 Sonnenburg, E.D., Smits, S.A., Tikhonov, M., Higginbottom, S.K., Wingreen, N.S., and  
1204 Sonnenburg, J.L. (2016). Diet-induced extinctions in the gut microbiota compound over  
1205 generations. *Nature* *529*, 212-215.
- 1206 Sonnenburg, E.D., Zheng, H., Joglekar, P., Higginbottom, S.K., Firkbank, S.J., Bolam, D.N., and  
1207 Sonnenburg, J.L. (2010). Specificity of polysaccharide use in intestinal *Bacteroides* species  
1208 determines diet-induced microbiota alterations. *Cell* *141*, 1241-1252.
- 1209 Sonnenburg, J.L., Xu, J., Leip, D.D., Chen, C.H., Westover, B.P., Weatherford, J., Buhler, J.D.,  
1210 and Gordon, J.I. (2005). Glycan foraging in vivo by an intestine-adapted bacterial symbiont.  
1211 *Science* *307*, 1955-1959.
- 1212 Temple, M.J., Cuskin, F., Basle, A., Hickey, N., Speciale, G., Williams, S.J., Gilbert, H.J., and  
1213 Lowe, E.C. (2017). A *Bacteroidetes* locus dedicated to fungal 1,6-beta-glucan degradation:  
1214 Unique substrate conformation drives specificity of the key endo-1,6-beta-glucanase. *J. Biol.*  
1215 *Chem.* *292*, 10639-10650.
- 1216 TerAvest, M.H., Z; Rosenbaum, MA; Martens, EC; Cotta, MA; Gordon, JI; Angenent, LT  
1217 (2013). Regulated Expression of Polysaccharide Utilization and Capsular Biosynthesis Loci in  
1218 Biofilm and Planktonic *Bacteroides thetaiotamicron* During Growth in Chemostats. *Biotechnol.*  
1219 *Bioeng.* *111*, 165-173.
- 1220 Terrapon, N., Lombard, V., Drula, E., Lapebie, P., Al-Masaudi, S., Gilbert, H.J., and Henrissat,  
1221 B. (2018). PULDB: the expanded database of Polysaccharide Utilization Loci. *Nucleic Acids*  
1222 *Res.* *46*, D677-D683.
- 1223 van Arkel, J., Sevenier, R., Hakkert, J.C., Bouwmeester, H.J., Koops, A.J., and van der Meer,  
1224 I.M. (2013). Tailor-made fructan synthesis in plants: a review. *Carbohydr. Polym.* *93*, 48-56.
- 1225 Versées, W., and Steyaert, J. (2003). Catalysis by nucleoside hydrolases. *Curr. Opin. Struct.*  
1226 *Biol.* *13*, 731-738.



- 1227 Weickmann, J.L., Olson, E.M., and Glitz, D.G. (1984). Immunological Assay of Pancreatic  
1228 Ribonucleases in Serum as an Indicator of Pancreatic Cancer. *Cancer Res.* *44*, 1682-1687.
- 1229 Zimmermann, M., Zimmermann-Kogadeeva, M., Wegmann, R., and Goodman, A.L. (2019).  
1230 Separating host and microbiome contributions to drug pharmacokinetics and toxicity. *Science*  
1231 *363*, eaat9931.
- 1232

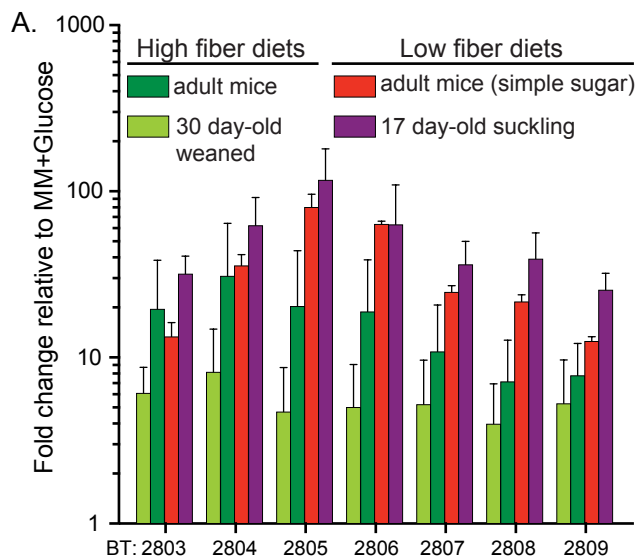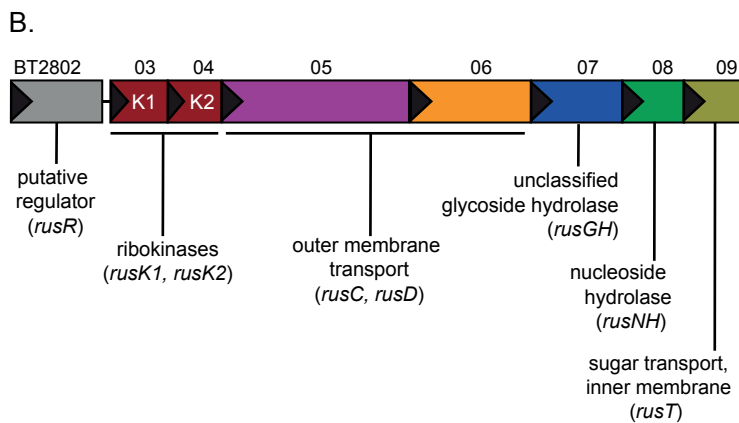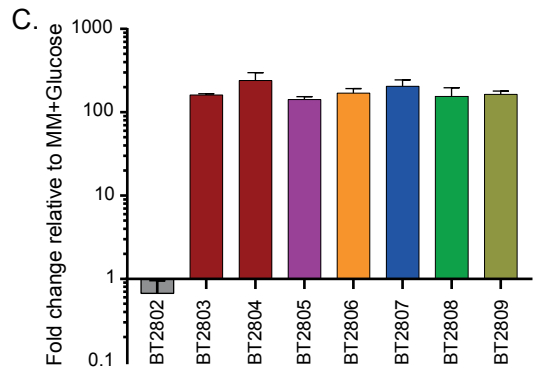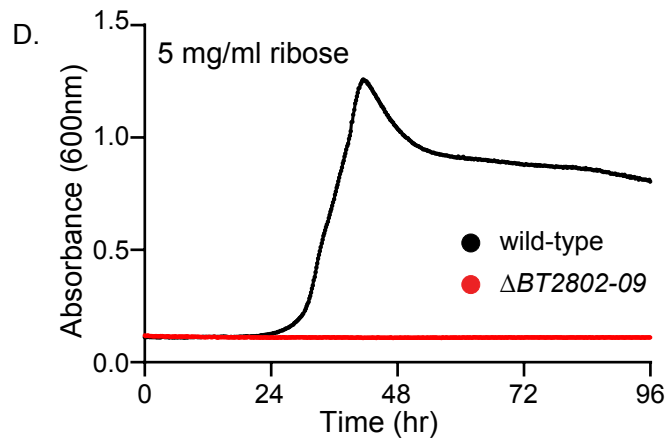

Glowacki et al. Figure 2

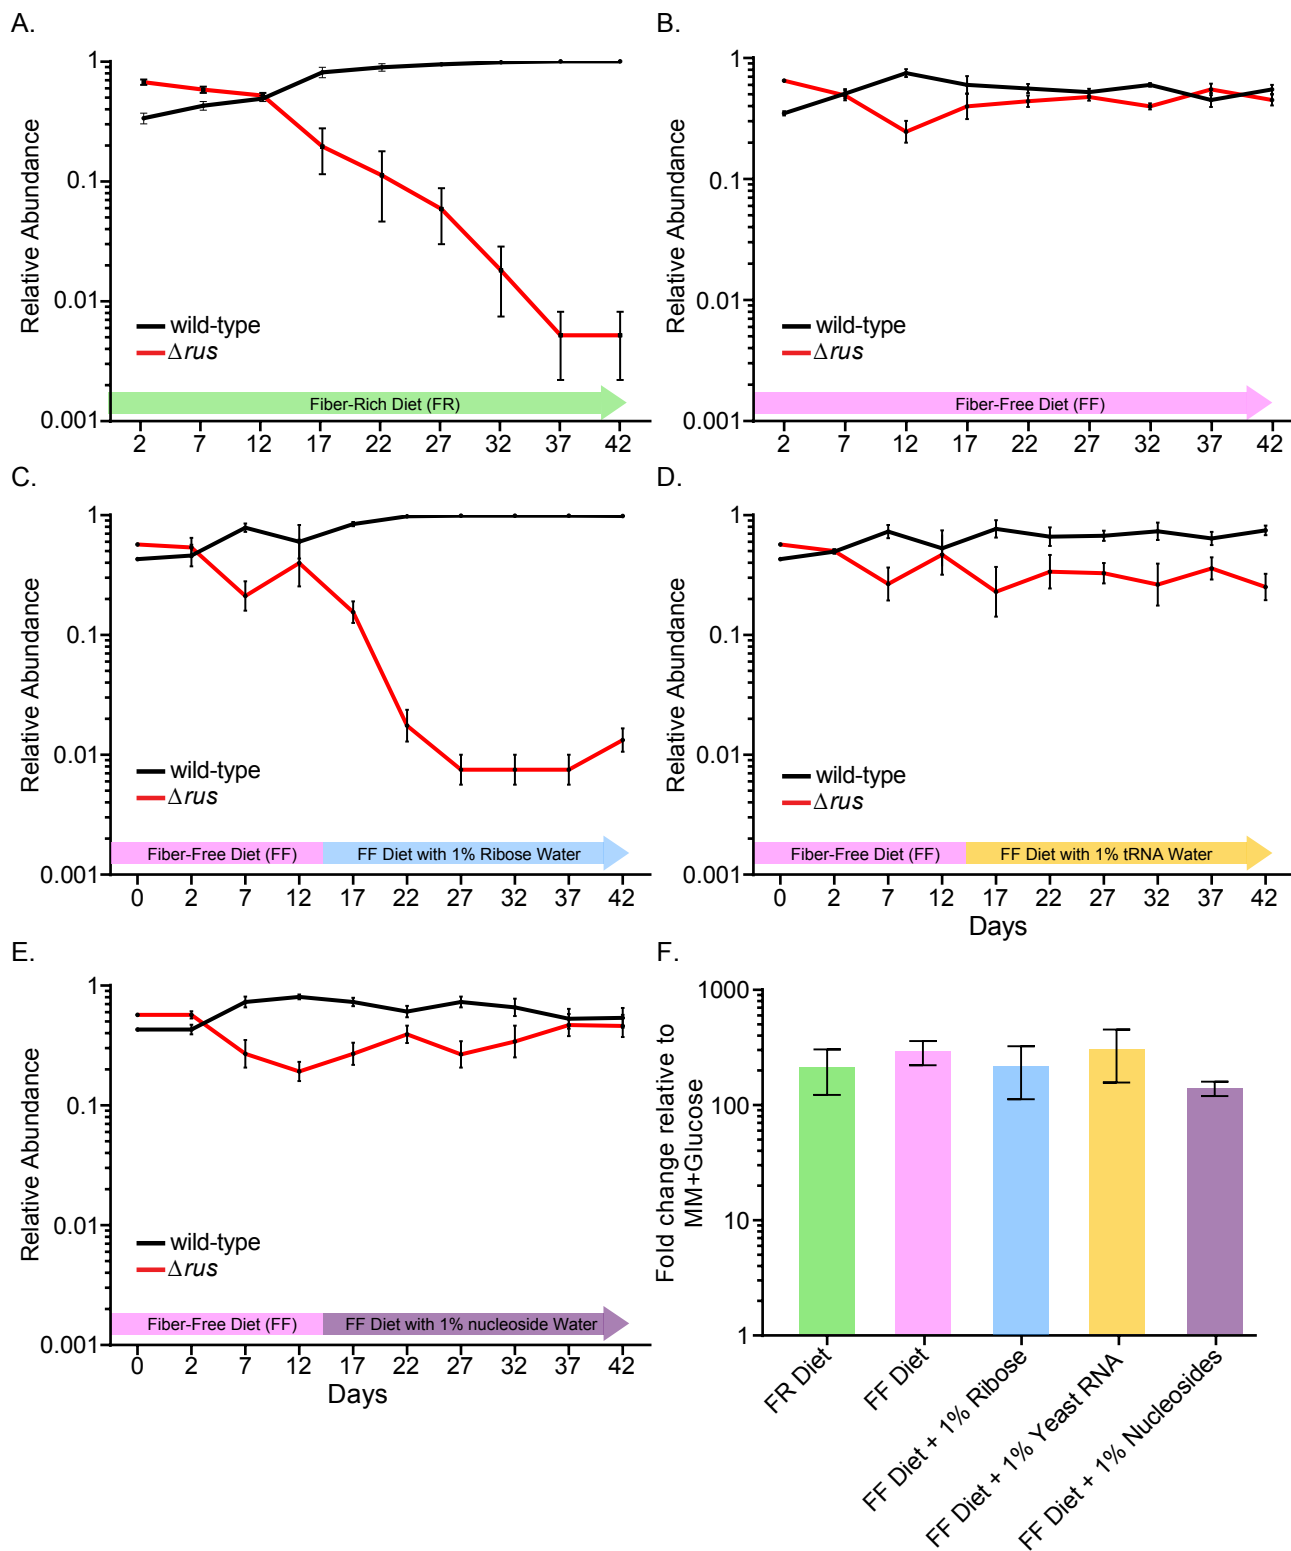

Glowacki et al. Figure 3

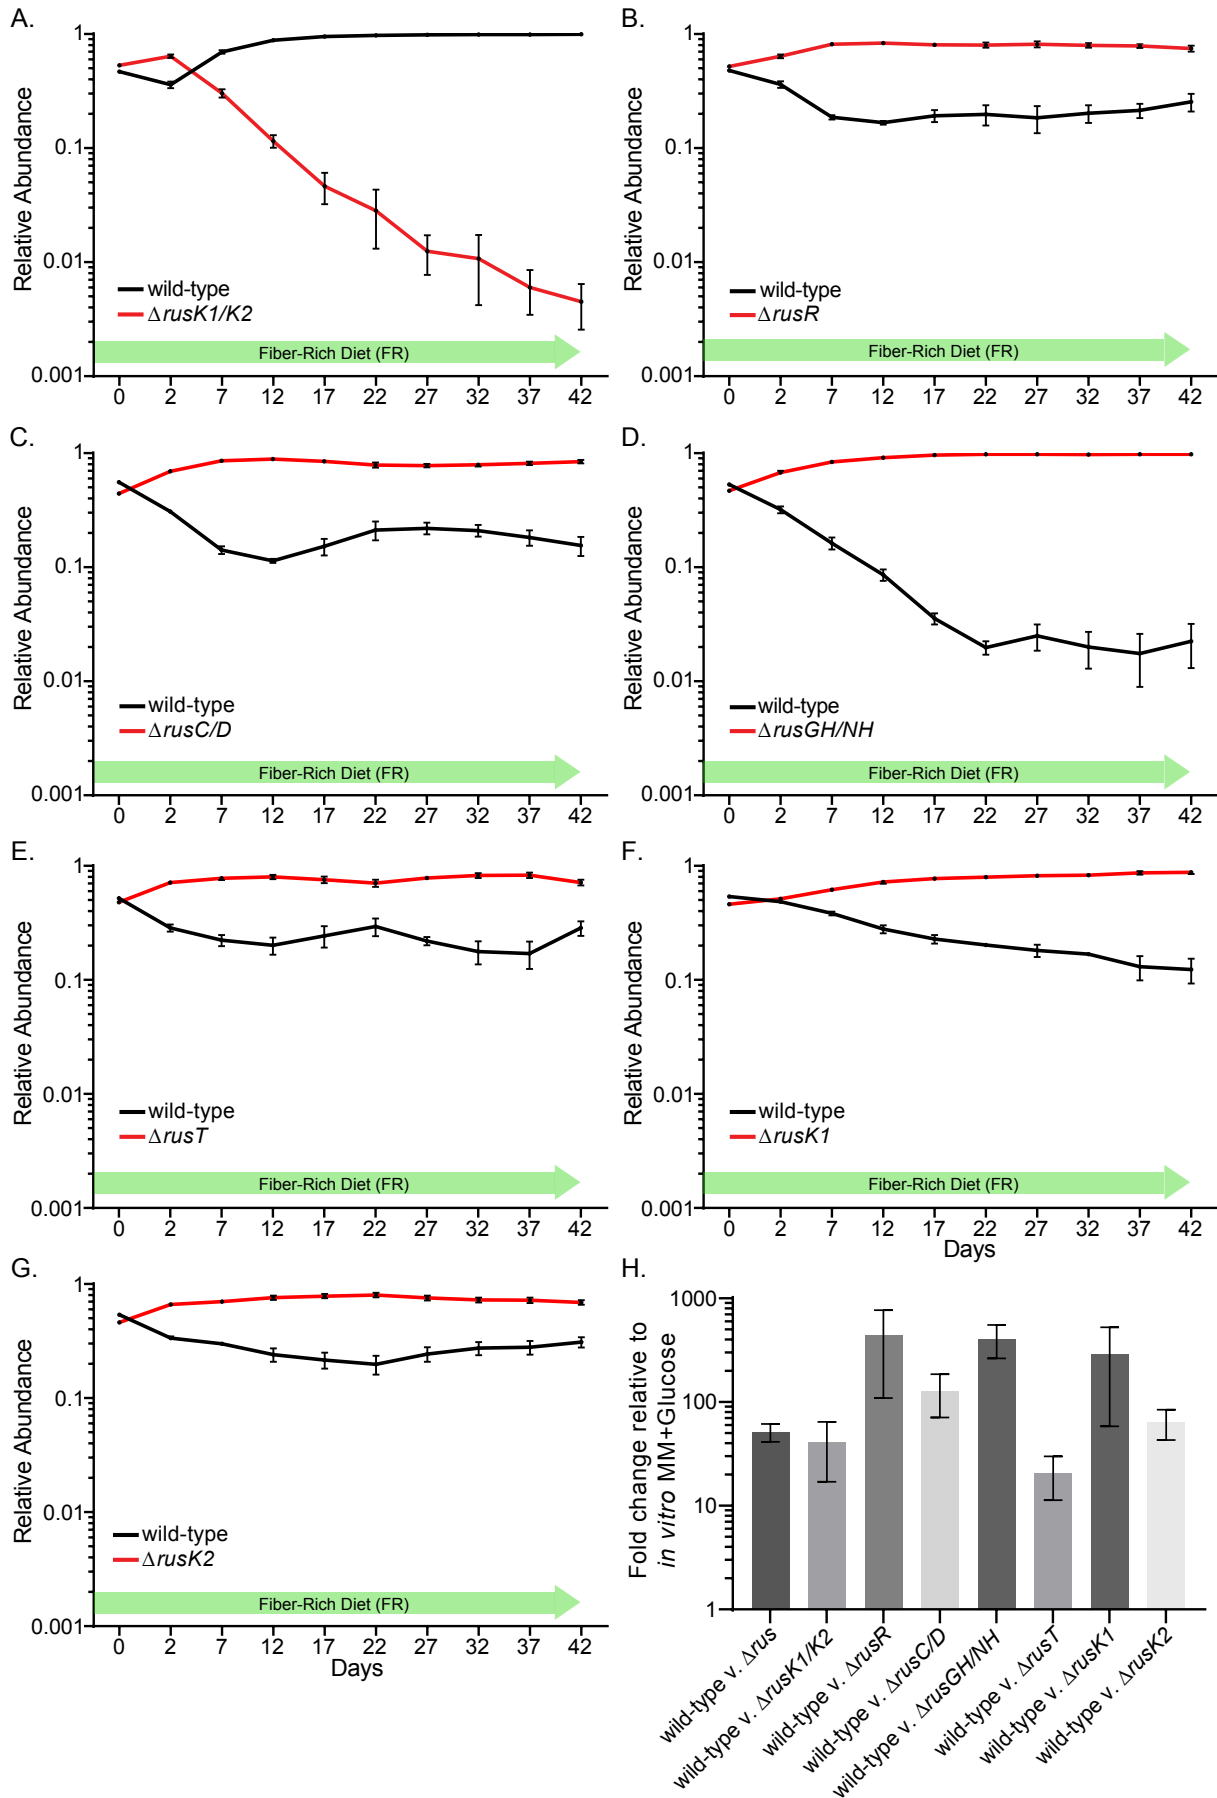

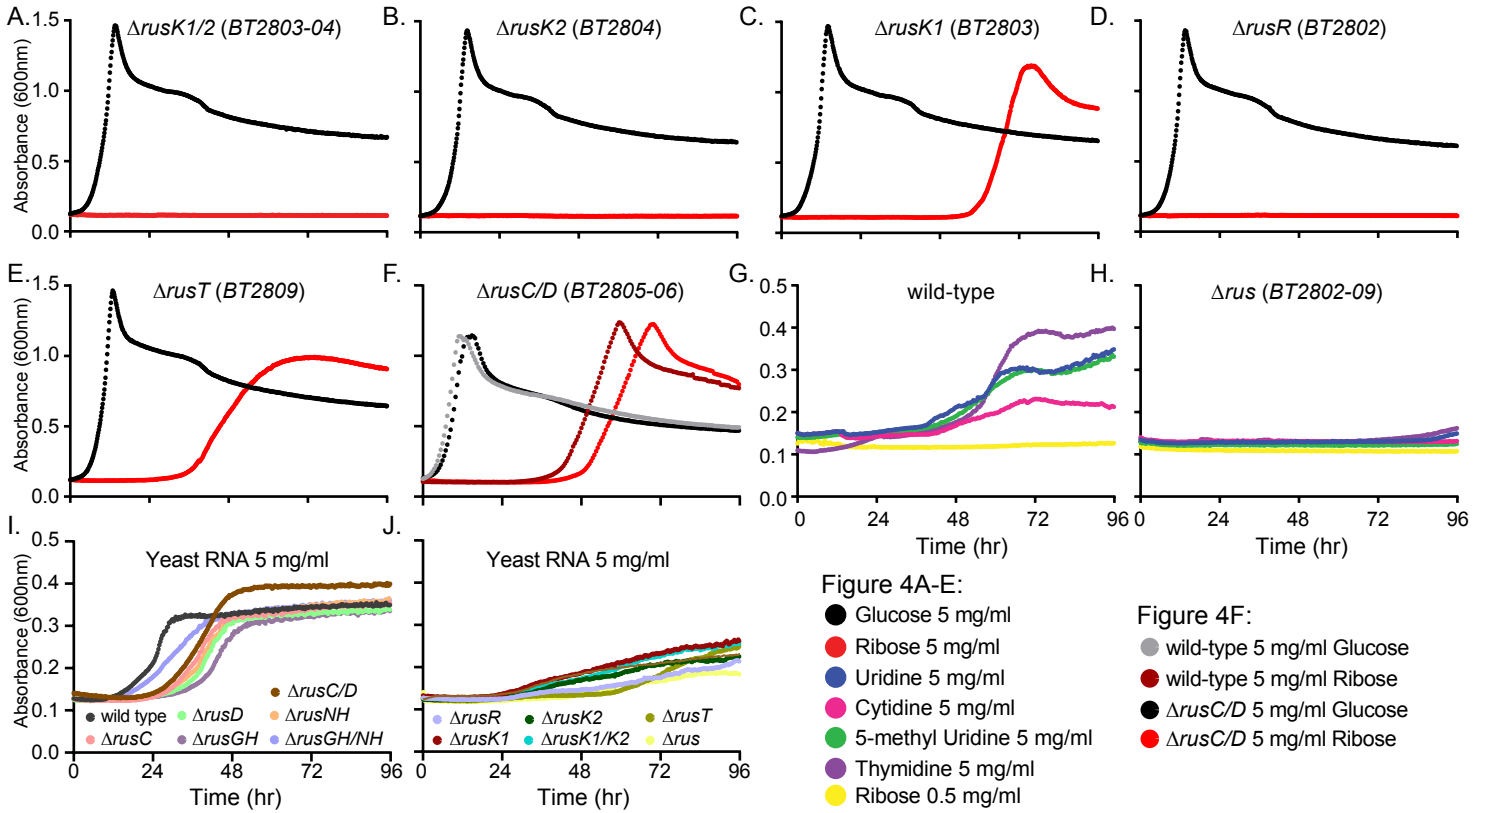

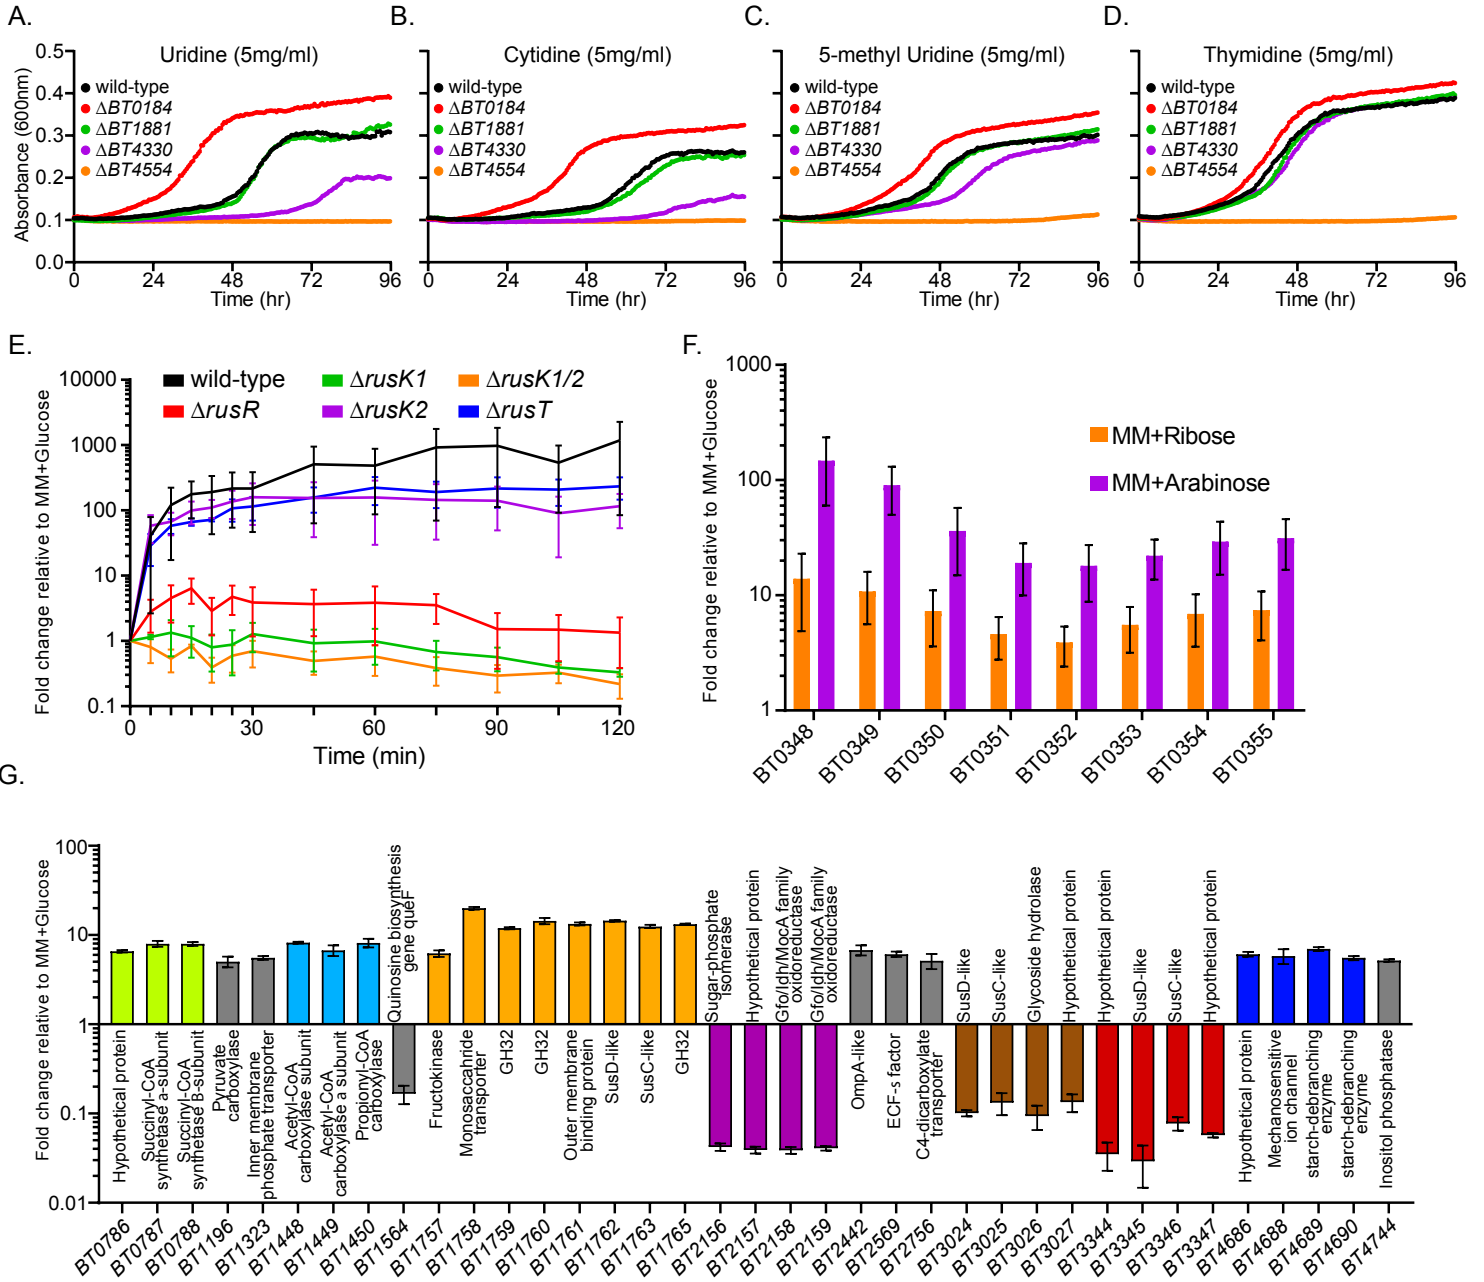

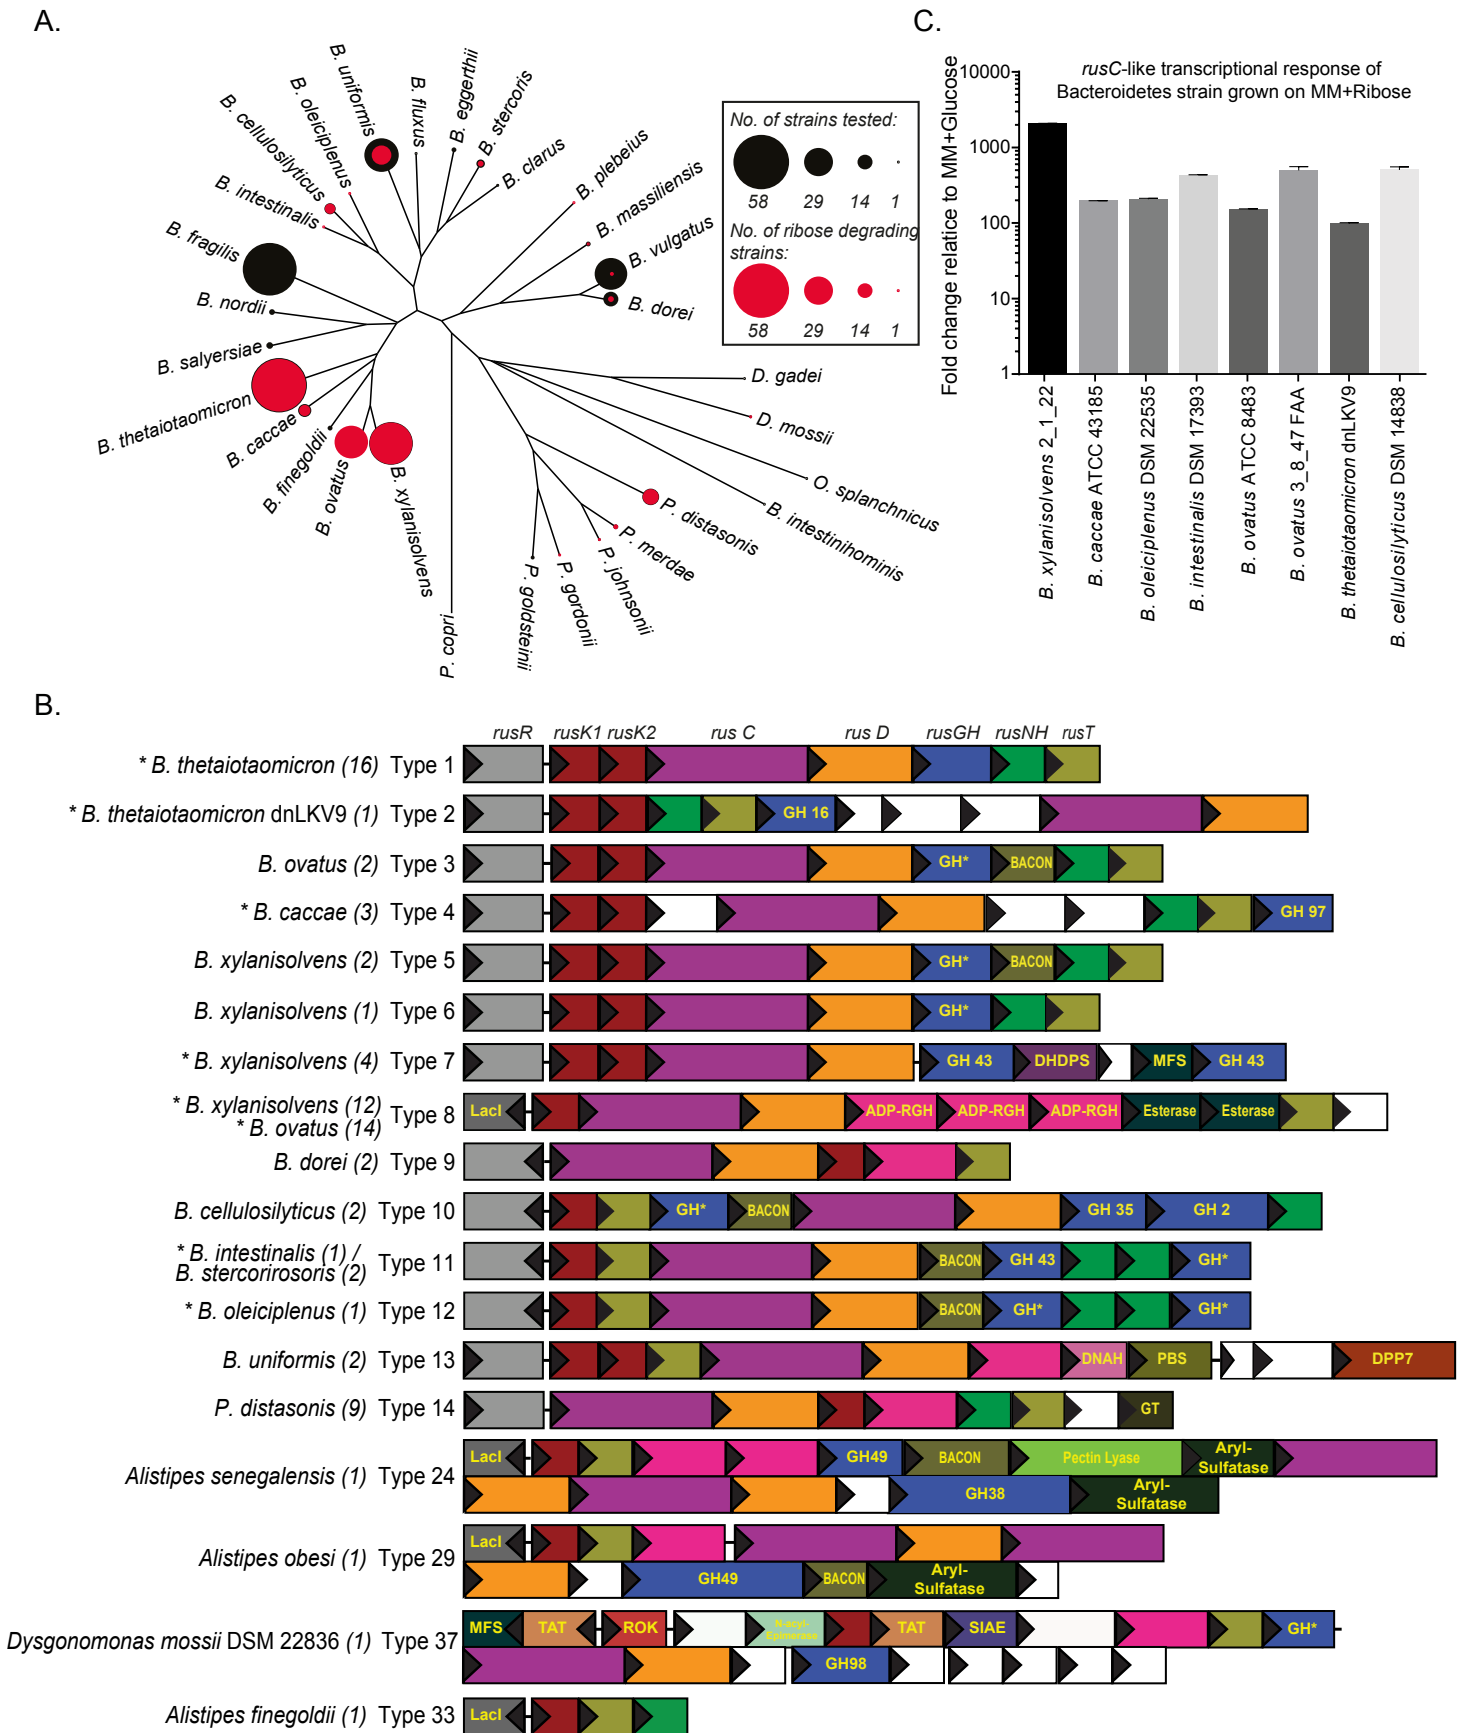

Glowacki et al. Figure 7

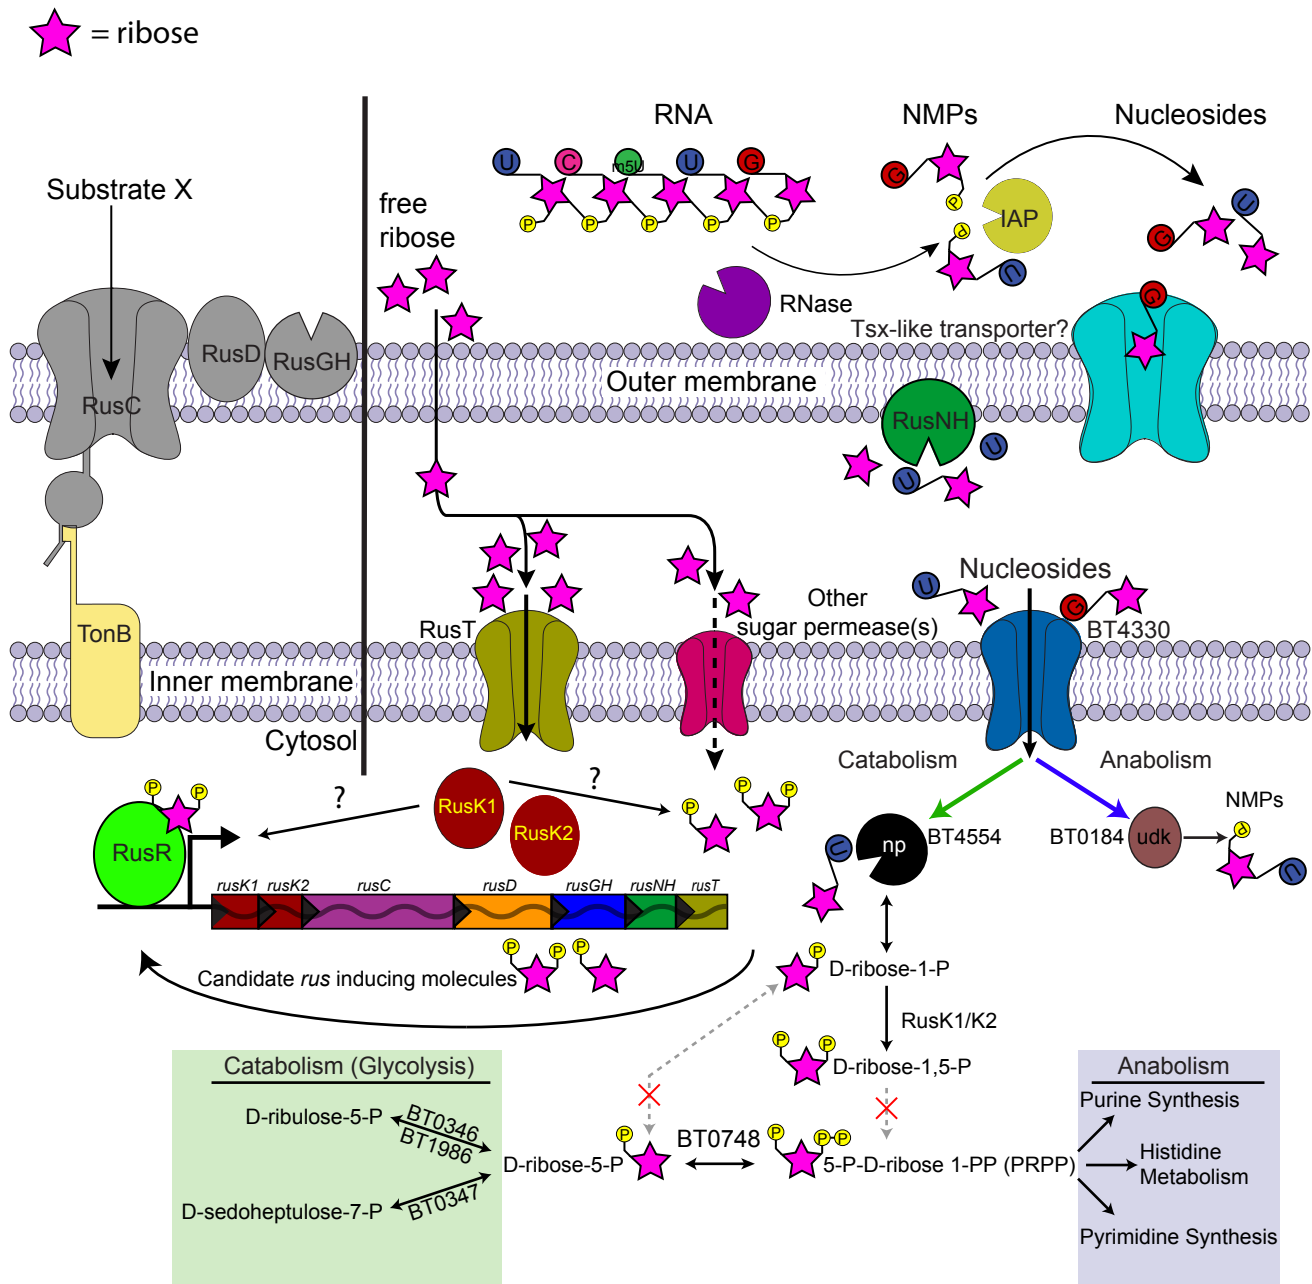



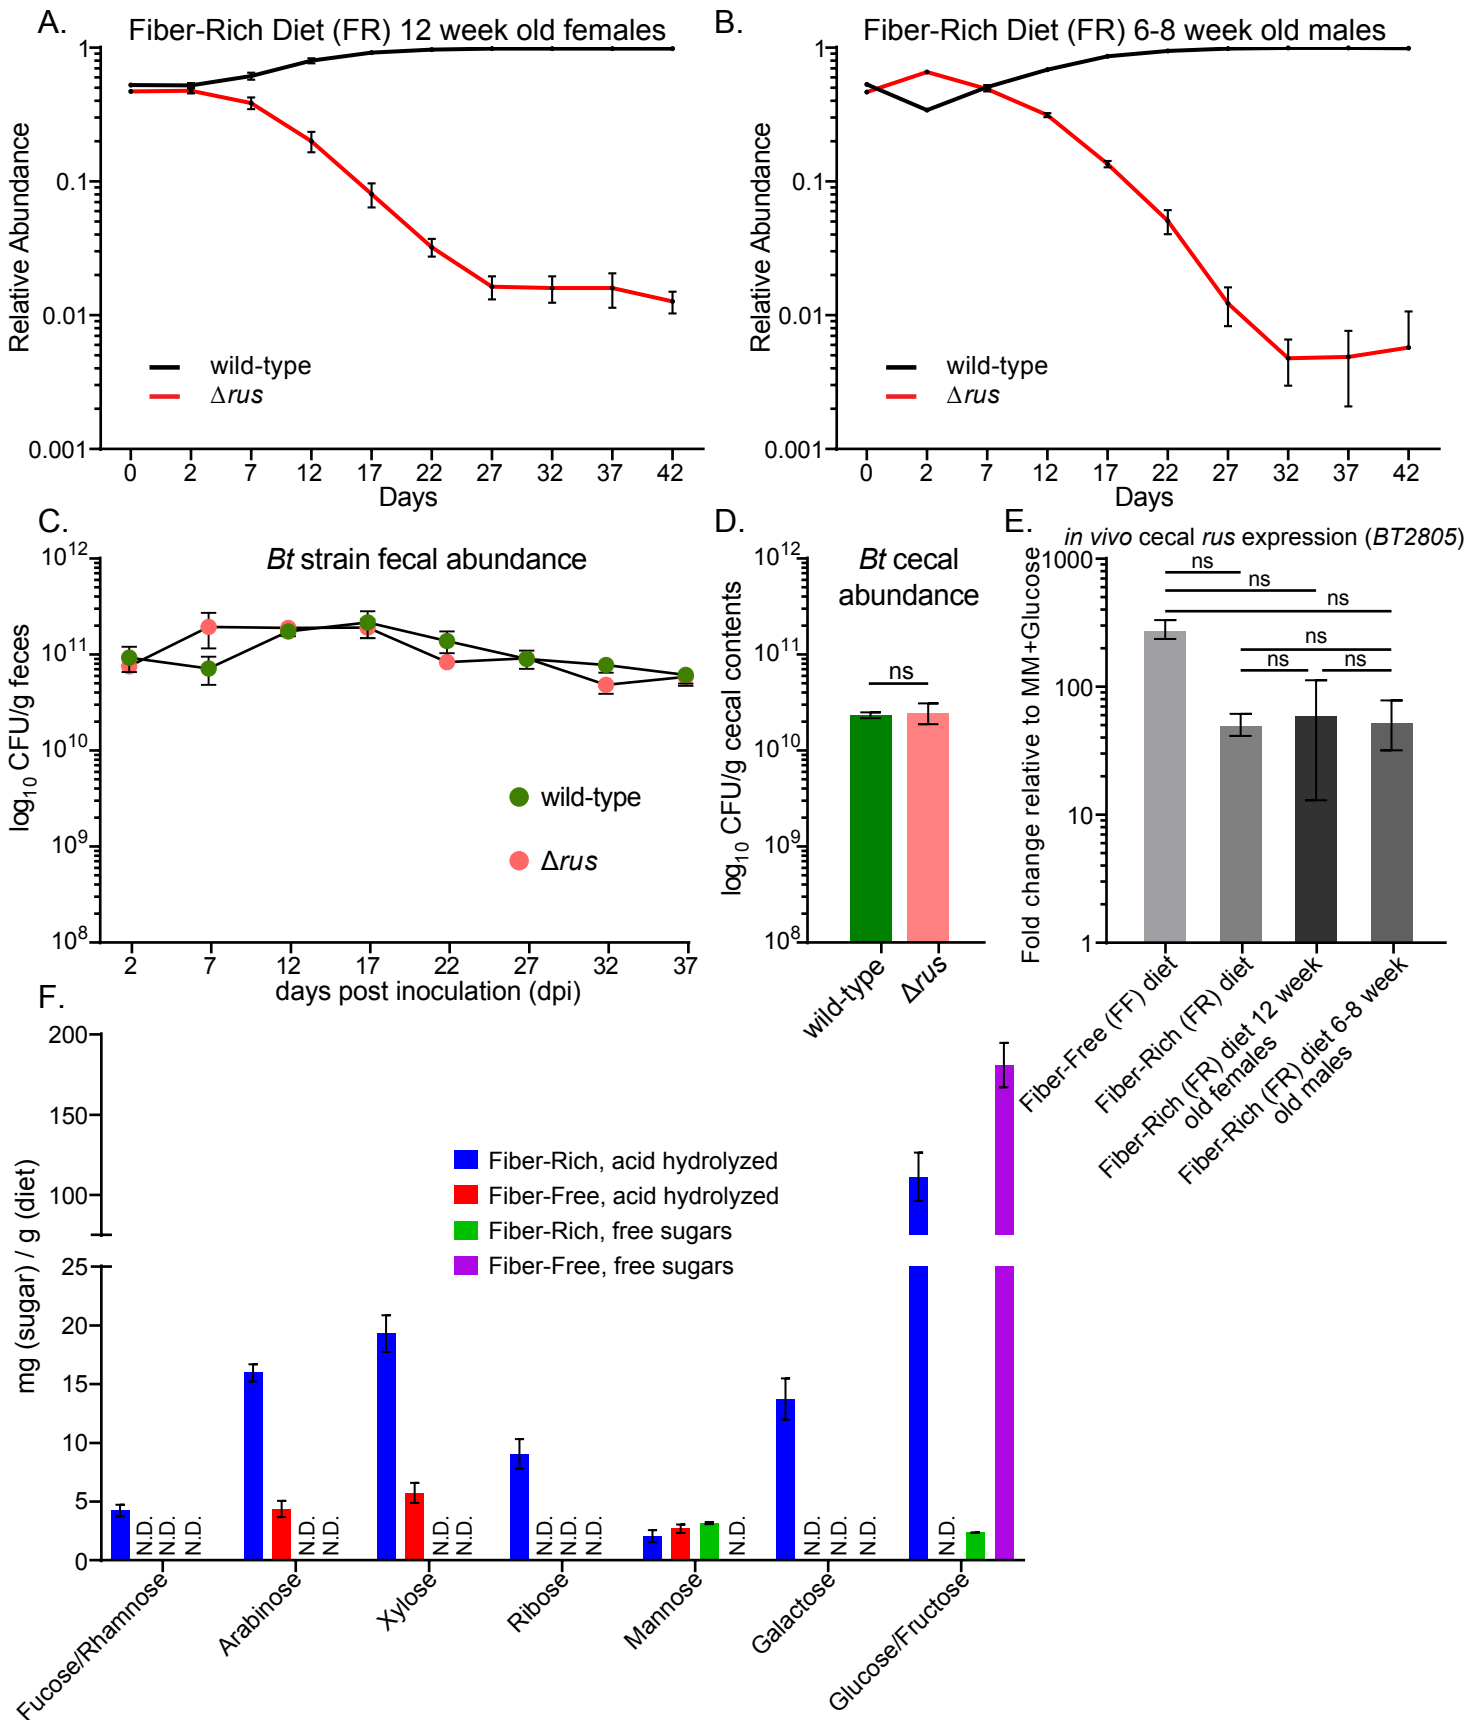

Glowacki et al. Figure S2

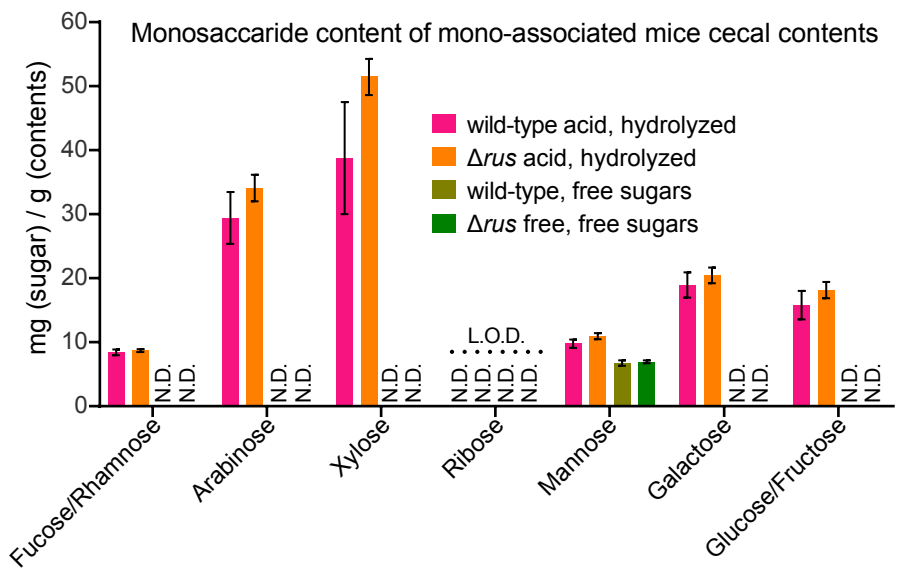

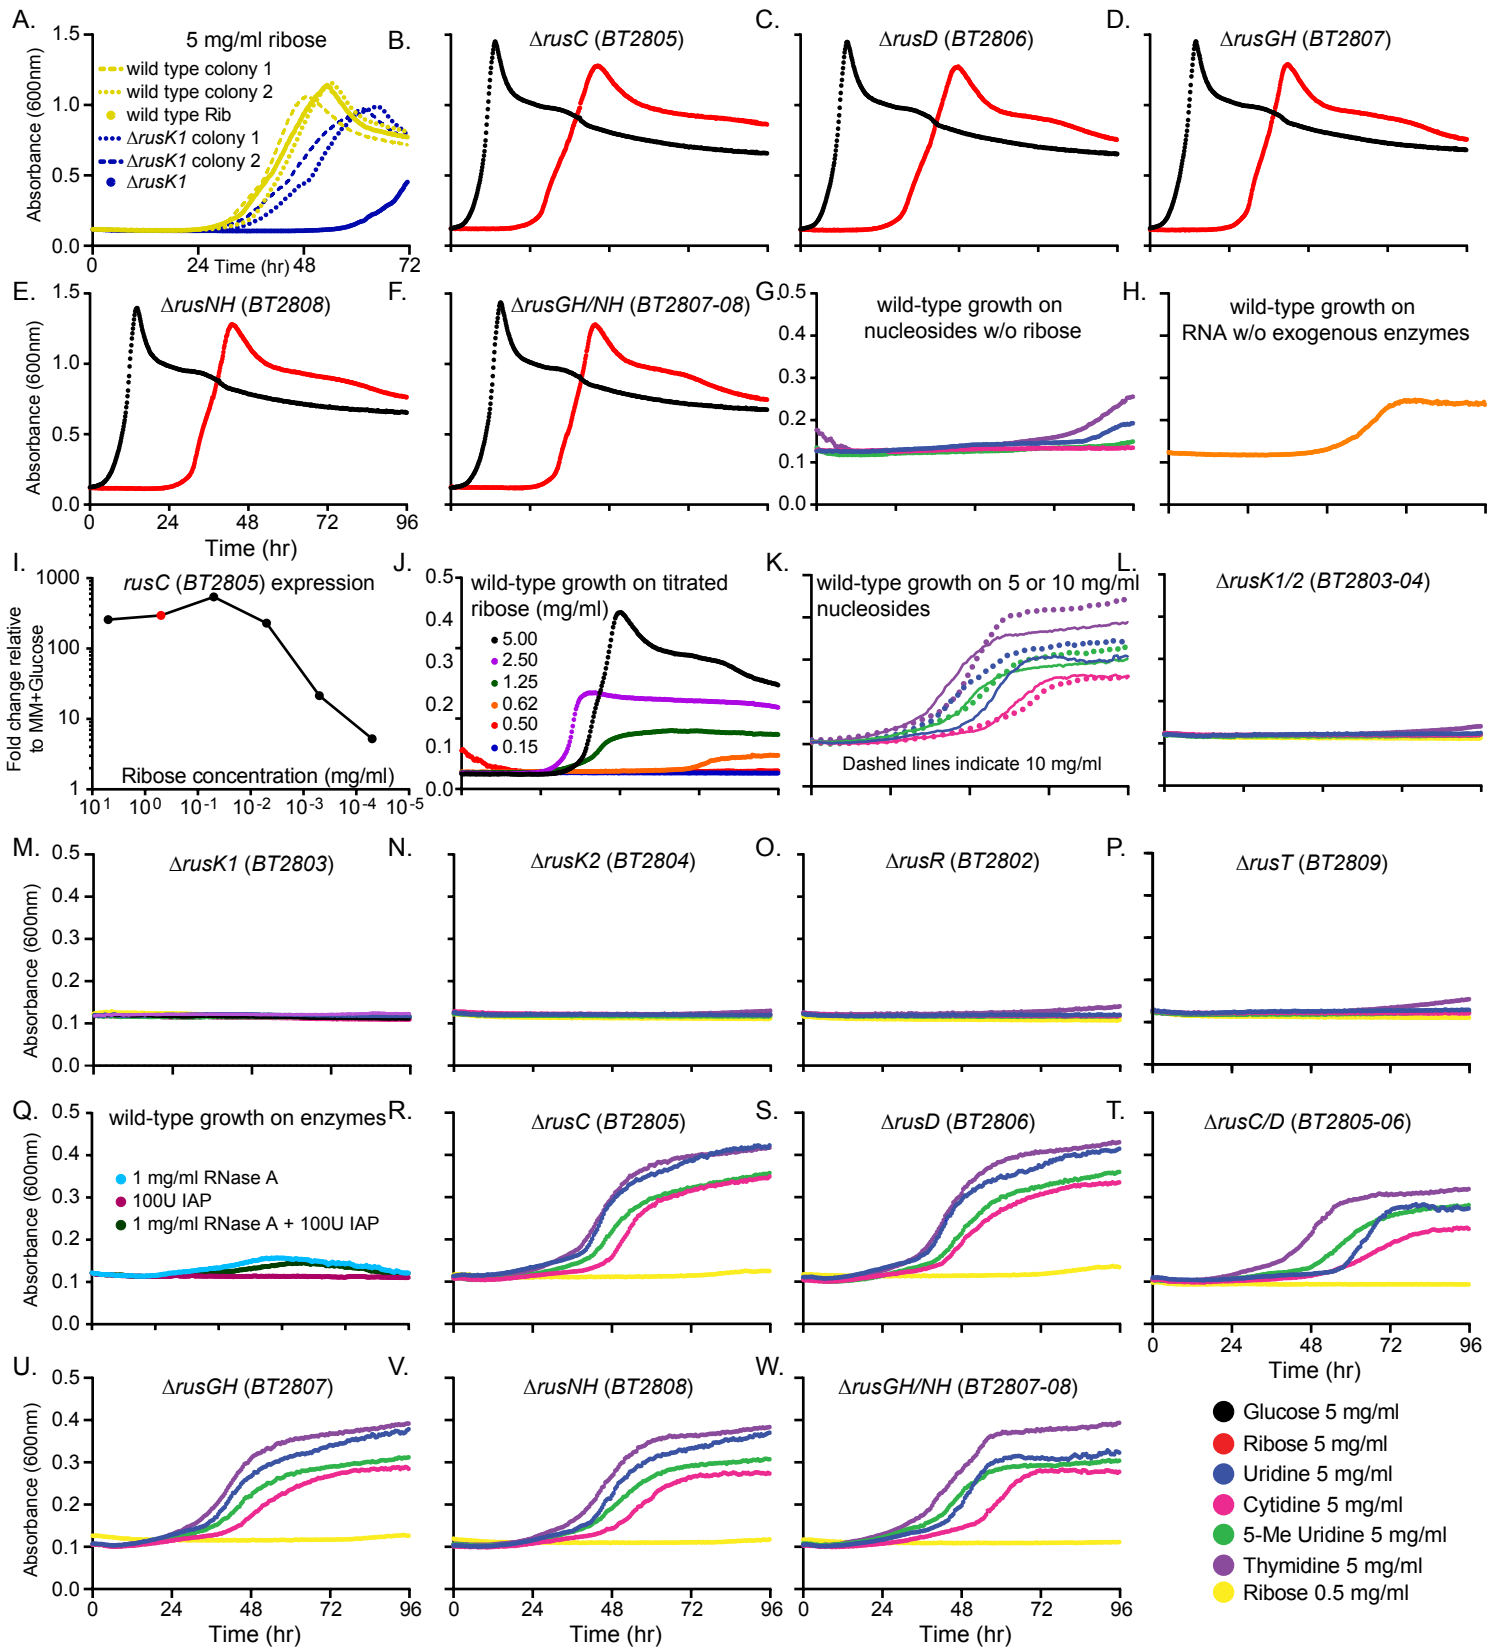

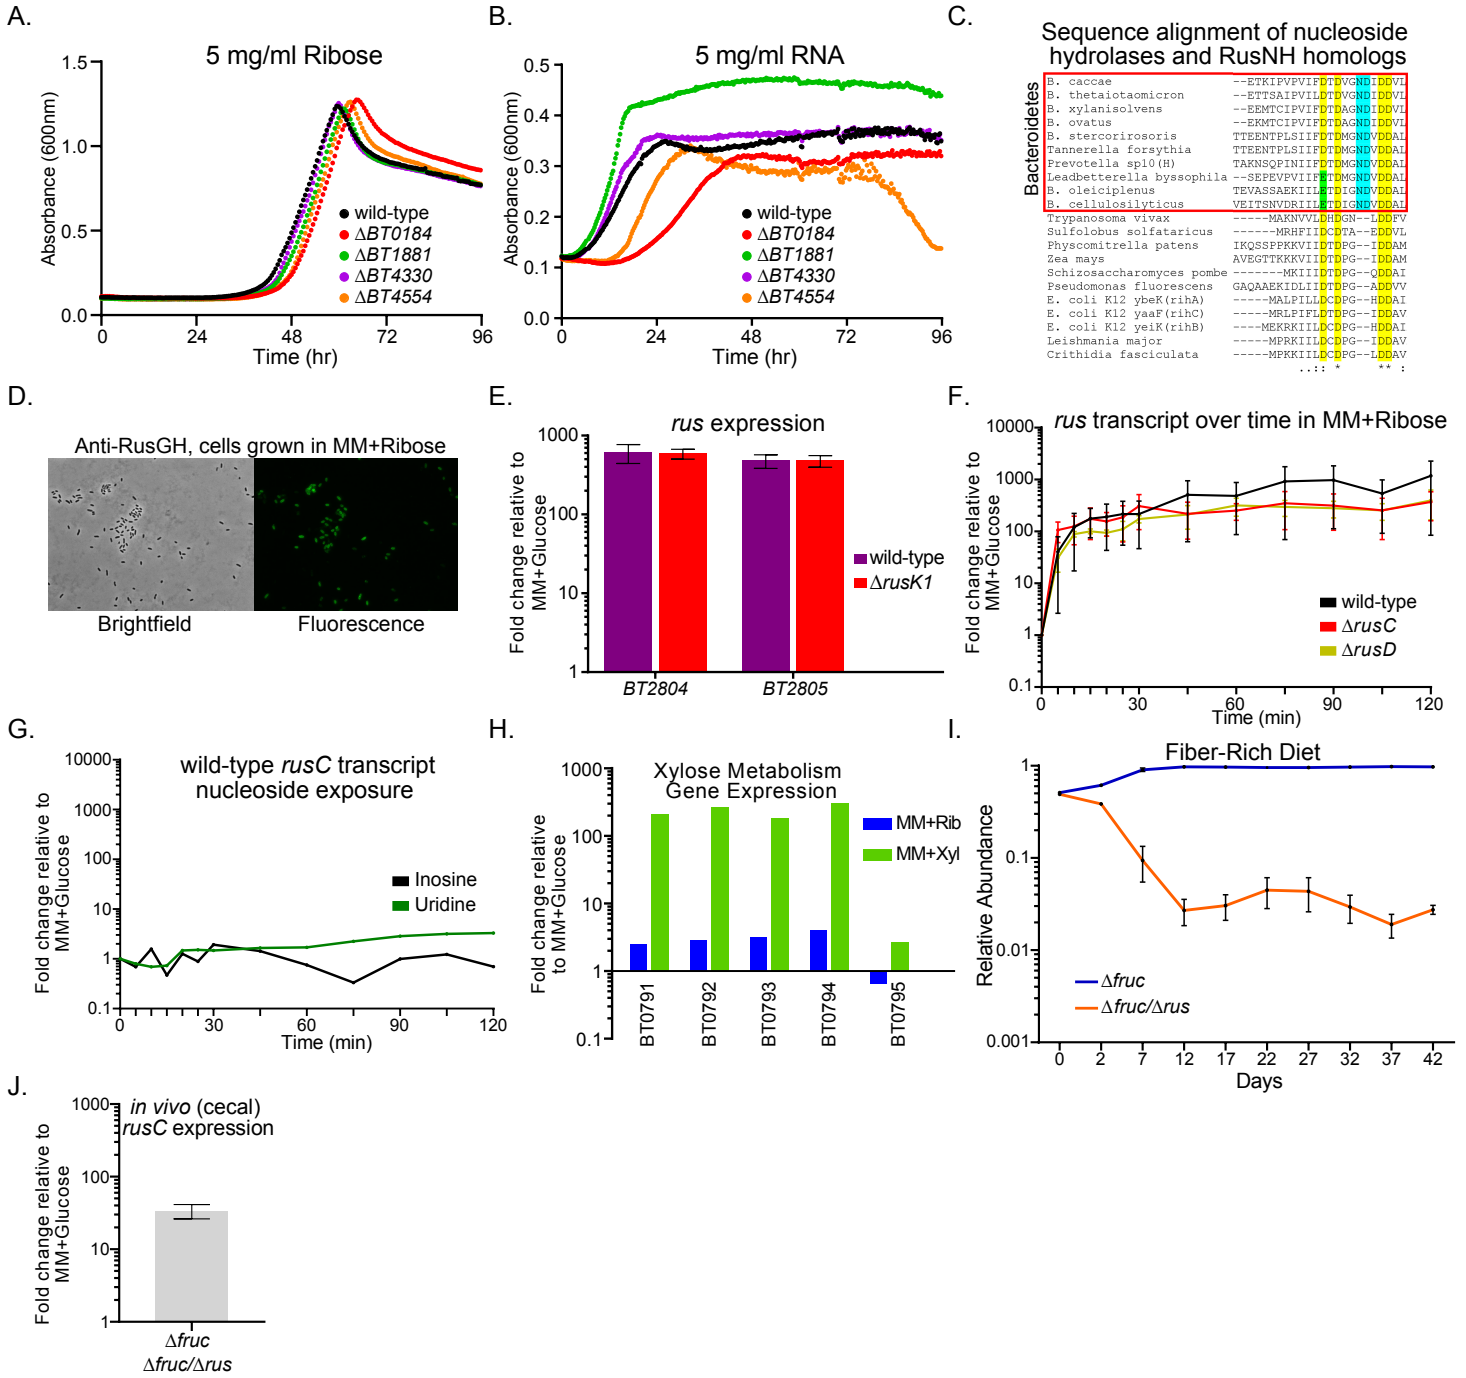

Glowacki et al. Figure S5

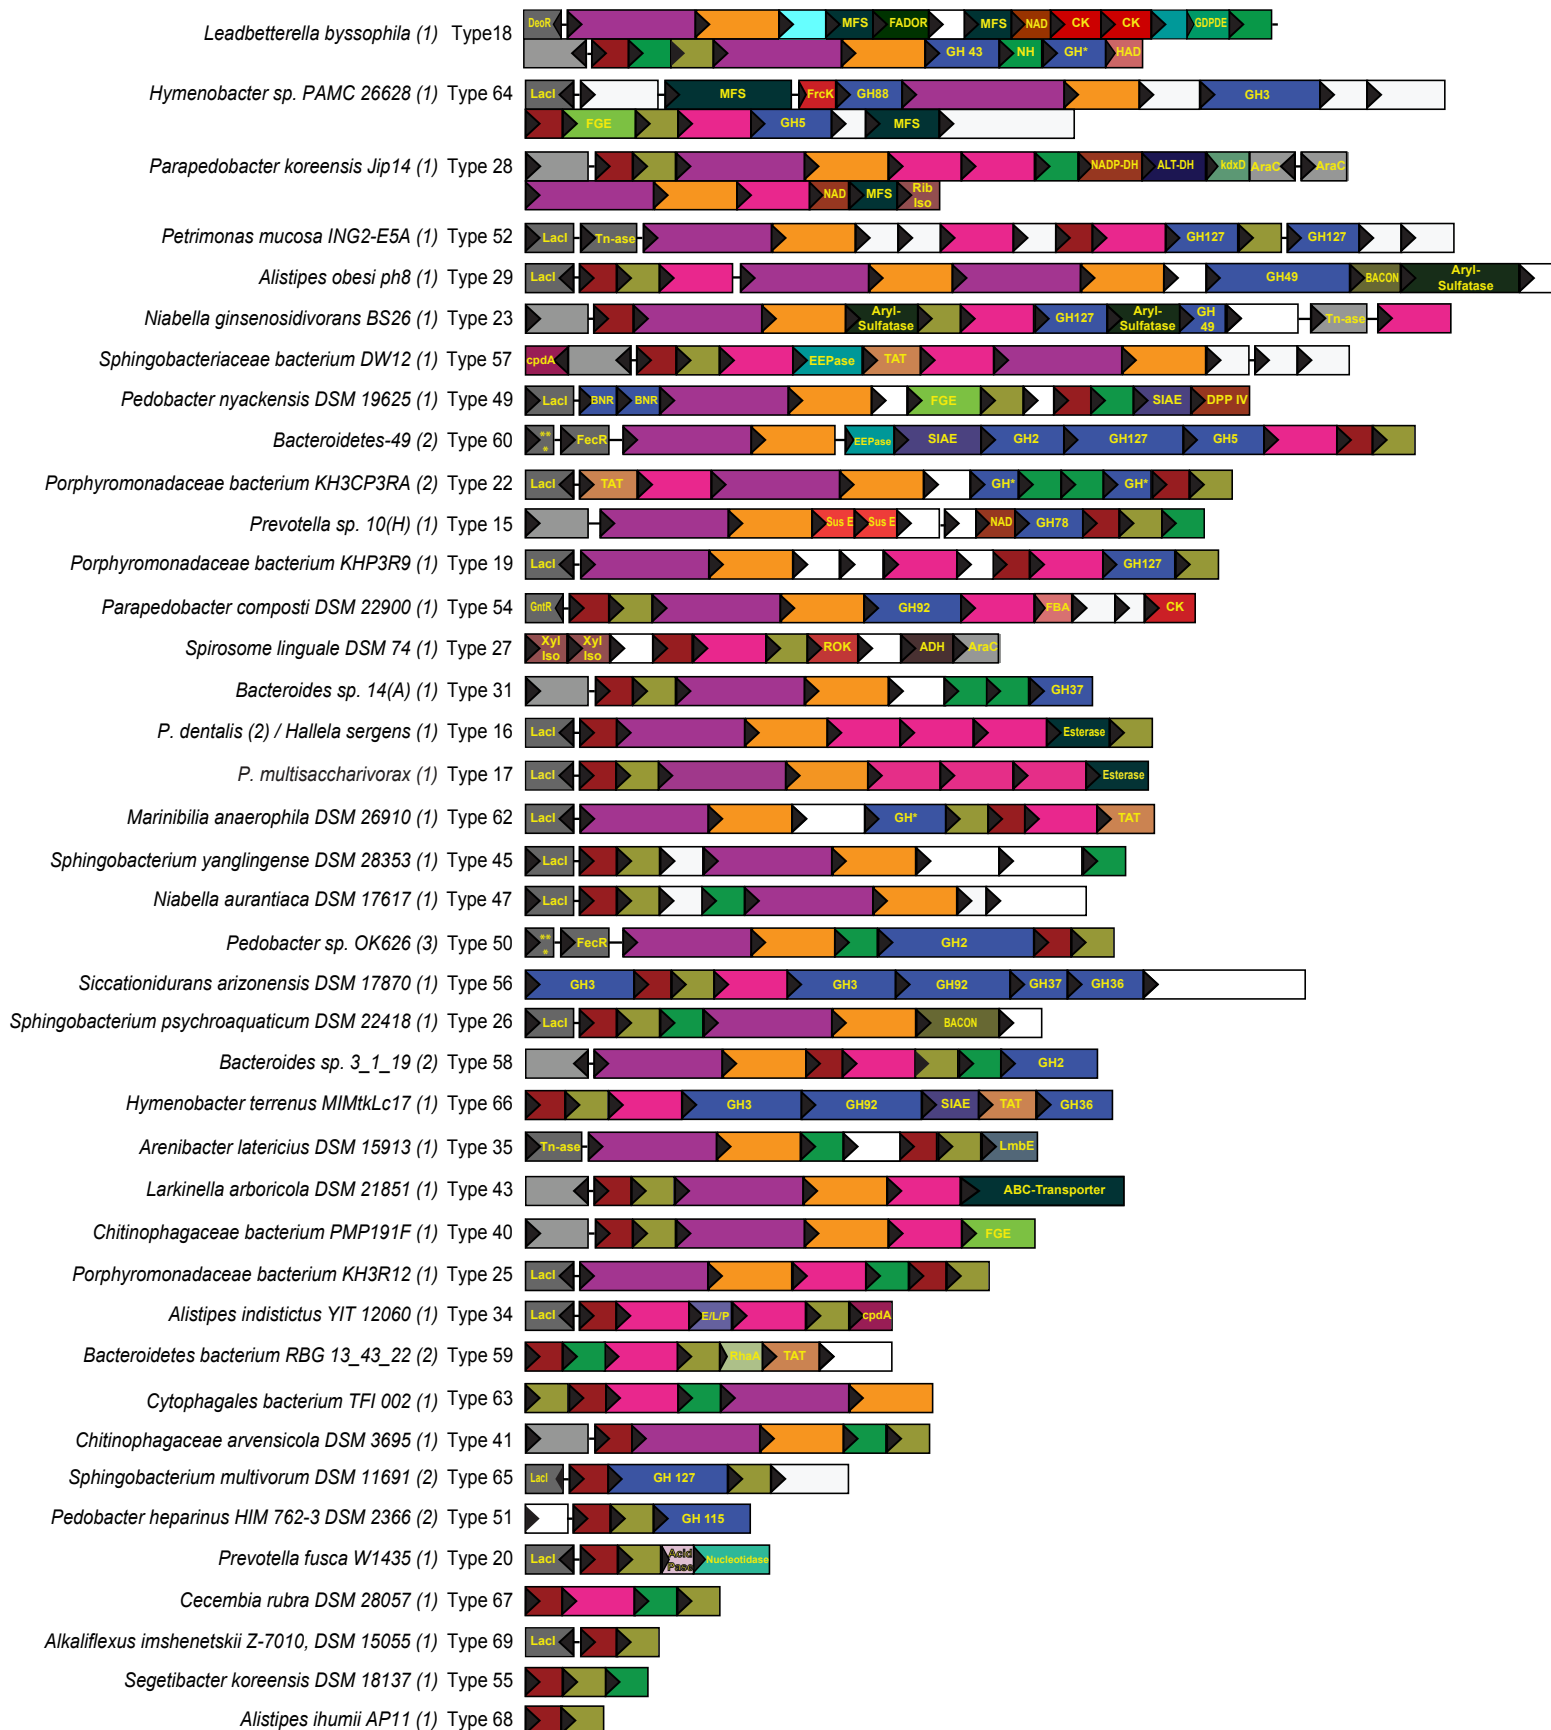

Source: http://biorxiv.org/content/10.1101/574913v1.full.pdf
